# Supplementary material for: Correlation and mediation analysis between plasmapheresis donation behavior and bone mineral density and bone metabolism biomarkers: a cross-sectional study based on plasmapheresis donors at high risk of osteoporosis in China
Source: PeerJ. 2024 Dec 19;12:e18589. doi: 10.7717/peerj.18589 (PMC11663400; doi:10.7717/peerj.18589)
Supplement: Data S1 [file peerj-12-18589-s007.xlsx]

## Sheet: raw data
ID	Type of plasmapheresis donors	Region	Age	Sex	BMI	Income(per year)	Weekly exercise and physical labor intensity	Dietary intake of meat, eggs, and dairy products	Calcium supplements	vitaminD supplements	Menopausal condition	Menopausal age	Menopausal duration	Corrected calcium	L1	L2	L3	L4	Lumbar L1-L4 BMD	LumbarL1-L4 Tvalue	Left femoral neck BMD	Left femoral neck Tvalue	Right femoral neck BMD	Right femoral neck Tvalue	Radius BMD	Radius Tvalue	The amount of anticoagulant	Total number of donations (group)	Total number of donations	The recent frequency of donation（group）	The recent frequency of donation	Interval between the last donation	Interval between the last donation（group）	ALB（gl)	25OHD（ngml）	PTH（pgml）	P1NP（ngml）	β-CTX（ngml）
1	1	0	55	0	25.8065	2	1	3	1	1	1	50	5	2.394	0.862	0.892	0.979	0.996	0.94	-2.1	0.798	-1.7	0.738	-2.2			98	3	229	3	22	16	2	37.3	13.86		71.28	0.404
2	1	0	56	0	27.0552	2	1	3	1	1	1	47	9	2.344		0.862	0.919	0.885	0.891	-2.6	0.808	-1.7	0.803	-1.7			98	2	102	3	24	14	1	38.3	11.37		102.2	0.335
3	1	0	53	0	26.4855	1	2	2	1	1	1	50	3	2.336	0.787	0.842	0.898	0.868	0.852	-2.8	0.873	-1.2					87	2	179	3	24	14	1	43.2	18.1		75.98	0.115
4	1	0	54	0	24.4444	1	2	2	1	1	1	47	7	2.414	0.7	0.834	0.907	0.854	0.832	-2.9	0.88	-1.1	0.842	-1.4			81	2	154	3	26	16	2	40.3	13.38		90.43	0.292
5	1	0	55	0	25	3	2	3	1	1	1	52	3	2.338	0.942	0.986	1.116	1.107	1.044	-1.2	0.819	-1.6	0.853	-1.3			87	3	299	2	16	113	3	41.1	14.72		99.94	0.067
6	1	0	54	0	23.1111	1	2	2	1	1	1	49	5	2.264	0.925	0.976	1.04	1.187	1.044	-1.2	0.848	-1.4	0.803	-1.7			94	3	291	3	19	14	1	41.8	19.29		143.7	0.655
7	1	0	56	0	24.7325	2	2	1	1	1	1	52	4	2.32	1.031	0.881	1.008	1.179	1.034	-1.3	0.825	-1.5	0.818	-1.6			85	3	302	3	21	15	2	38.5	14.23		55.7	0.227
8	0	0	56	0	19.7239	2	2	3	2	1	1	53	3	2.276	0.892	1.008	1.086	1.057	1.079	-1.4	0.685	-2.5	0.673	-2.6			0	0	0	0	0	0	0	41.7	26.47		75.51	0.207
9	1	0	55	0	24.0346	2	1	3	1	1	1	52	3	2.27	1.027	1.061	1.134	1.124	1.092	-0.8	1.041	0	0.989	-0.4			75	2	105	2	15	14	1	41.5	20.48		75.68	0.359
10	1	0	55	0	35.3212	2	1	3	1	1	1	52	3	2.32	1.146	1.149	1.073	0.849	1.056	-1.1	0.958	-0.6	0.913	-0.9			96	2	142	3	23	15	2	36.5	17.04		61.63	0.15
11	1	0	52	0	25.3333	2	2	2	1	1	1	50	2	2.228	1.024	1.135	1.237	1.265	1.173	-0.2	0.848	-1.4	0.806	-1.7			98	3	341	3	24	14	1	43.1	8.54		75.69	0.369
12	0	0	57	0	24.0346	2	1	3	1	1	1	53	4	2.262	0.728	0.805	0.848	0.81	0.8	-3.2	0.837	-1.4	0.731	-2.2			0	0	0	0	0	0	0	42.9	19.38		75.68	0.459
13	1	0	51	0	22.5215	2	2	3	1	1	1	48	3	2.39	0.986	0.948	1.002	1.076	1.006	-1.5	0.959	-0.6	0.962	-0.5			98	2	146	2	15	36	3	40.5	17.07		33.21	0.143
14	1	0	52	0	24.0346	2	2	3	1	1	1	50	2	2.35	0.898	0.921	1.021	1.108	1	-1.6	0.847	-1.4	1.059	0.2			83	3	229	3	24	0	0	42	16.23		180.8	0.521
15	0	0	55	0	20.4	2	1	3	1	1	1	50	5	2.442	0.69	0.764	0.874	0.903	0.82	-3	0.704	-2.4	0.678	-2.6			0	0	0	0	0	14	1	44.4	22.69		93.33	0.552
16	0	0	56	0	24.6094	3	1	3	1	1	1	52	4	2.362	0.782	0.822	0.986	1.022	0.919	-1.3	0.691	-1.4	0.634	-1.9			0	0	0	0	0	0	0	40.4	29.52		61.71	0.303
17	0	0	57	0	30.0215	2	1	3	2	1	1	50	7	2.304	0.969	1.031	1.078	1.027	1.028	-1.3	0.878	-1.2	0.888	-1.1			0	0	0	0	0	0	0	40.8	20.22		78.4	0.284
18	1	0	54	0	23.6652	2	1	3	1	1	1	52	2	2.34	0.95	0.938	1.219	1.134	1.068	-1	0.933	-0.8	0.932	-0.8			98	3	298	3	25	14	1	44	17.27		111.2	0.288
19	0	0	57	0	19.9219	3	1	3	2	1	1	50	7	2.366	0.721	0.83	0.889	0.854	0.829	-3	0.735	-2.2	0.629	-2.9			0	0	0	0	0	0	0	40.2	14.18		94.67	0.333
20	0	0	52	0	22.8928	2	2	3	1	1	1	52	0	2.348	1.1	1.126	1.336	1.26	1.213	0.1	0.856	-1.3	0.884	-1.1			0	0	0	0	0	0	0	43.6	22.53		51.3	0.151
21	0	0	60	0	23.4375	2	2	3	1	1	1	49	11	2.356	0.857	0.853	0.894	0.879	0.872	-1.4	0.711	-1.1	0.676	-1.4			0	0	0	0	0	0	0	44.2	30.29		66.8	0.256
22	0	0	54	0	21.3675	3	1	3	1	1	1	49	5	2.238	0.807	0.752	0.894	1.047	0.883	-1.8	0.768	-1	0.708	-1.4			0	0	0	0	0	0	0	40.1	32.76		44.04	0.267
23	1	0	56	0	21.2279	2	2	3	1	1	1	48	8	2.39		0.722	0.788	0.732	0.749	-3.8	0.837	-1.4	0.82	-1.6			85	3	207	3	24	16	2	45.5	14.7		66.06	0.385
24	1	0	54	0	24.4444	1	2	2	1	1	1	51	3	2.376	0.837	1.007	0.924	0.853	0.909	-2.3	0.864	-1.2	0.844	-1.4			81	3	262	3	26	19	2	39.7	21.1		128.5	0.093
25	1	0	55	0	22.2222	2	1	3	1	1	1	50	5	2.338	0.937	0.955	1.017	1.142	1.025	-1.4	0.718	-2.3	0.667	-2.7			82	2	129	3	24	17	2	35.1	17.33		84.99	0.263
26	1	0	54	0	29.1363	2	1	2	1	1	1	50	4	2.292	0.765	0.852	0.973	0.905	0.881	-2.5	0.875	-1.2	0.851	-1.3			89	2	134	3	19	14	1	38.4	19.63		95.16	0.398
27	1	0	50	0	23.74	1	2	3	1	1	1	49	1	2.284	0.98	1.081	1.179	1.094	1.087	-0.9	0.648	-2.8	0.613	-3.1			94	2	120	1	2	14	1	42.3	17.66		68.5	0.142
28	1	0	54	0	28.1337	1	1	2	1	1	1	49	5	2.344	0.897	1.099	1.103	1.001	1.028	-1.3	0.824	-1.5	0.814	-1.6			95	3	215	3	23	14	1	39.8	18.37		49.32	0.046
29	0	0	54	0	25.6369	3	1	3	1	1	1	51	3	2.324	0.921	0.965	1.079	0.993	0.995	-1.6	0.868	-1.2	0.988	-0.4			0	0	0	0	0	0	0	40.8	18.74		59.2	0.307
30	1	0	54	0	25.3906	2	1	3	1	1	1	50	4	2.298	0.81	0.751	0.74	0.793	0.773	-3.4	0.79	-1.8	0.832	-1.5			84	3	287	3	24	16	2	39.6	20.79		65.44	0.284
31	1	0	51	0	22.3478	2	1	3	1	1	1	48	3	2.344	0.956	1.017	1.087	1.03	1.027	-1.4	0.903	-1	0.829	-1.5			98	2	116	3	26	15	2	43.3	11.34		52.82	0.201
32	1	0	51	0	28.1943	1	2	2	1	1	1	49	2	2.43	1.034	1.003	1.125	1.146	1.083	-0.9	0.988	-0.4	0.984	-0.4			88	2	187	3	25	14	1	40.5	21.58		130.1	0.498
33	0	0	58	0	25.3906	3	1	3	1	1	1	51	7	2.252	0.821	0.778	0.925	1.063	0.908	-2.3	0.699	-2.4	0.761	-2			0	0	0	0	0	0	0	39.9	14.18		91.9	0.449
34	0	0	55	0	26.6728	3	2	3	2	1	1	52	3	2.324	1.018	1.133	1.166	1.249	1.152	-0.3	0.879	-1.1	0.914	-0.9			0	0	0	0	0	0	0	41.3	18.57		82.86	0.694
35	1	0	54	0	27.0552	2	2	3	1	1	1	51	3	2.212	0.885	0.925	0.884	1.069	0.945	-2	0.838	-1.4	0.682	-2.6			85	2	172	3	24	14	1	42.4	13.86		113.7	0.421
36	0	0	58	0	19.2277	2	1	3	1	1	1	51	7	2.382	0.962	0.918	0.973	1.052	0.984	-1.7	0.802	-1.7	0.742	-2.1			0	0	0	0	0	0	0	44.4	32.78		97.66	0.626
37	1	0	56	0	21.6413	1	2	2	1	1	1	48	8	2.394	0.778	0.888	1.046	1.002	0.939	-2.1	1.019	-0.1					90	3	300	3	25	19	2	39.3	18.22		76.29	0.065
38	0	0	53	0	24.974	2	1	3	2	1	1	52	1	2.382	0.723	0.782	0.865	0.855	0.81	-3.1	0.745	-2.1	0.78	-1.9			0	0	0	0	0	0	0	45.4	16.65		54.45	0.155
39	0	0	59	0	23.7253	2	2	3	1	1	1	52	7	2.688		0.798	0.733	0.902	0.813	-3.2	0.626	-3	0.62	-3			0	0	0	0	0	0	0	43.6	25.05		77.09	0.203
40	1	0	55	0	23.7332	1	1	1	1	1	1	49	6	2.286	0.793	0.82	0.855	0.852	0.833	-2.9	0.809	-1.6	0.832	-1.5			98	1	50	3	19	14	1	43.2	14.72		114.4	0.575
41	0	0	56	0	21.7778	2	2	3	1	1	1	49	7	2.192	0.722	0.693	0.741	0.706	0.716	-3	0.6	-2.1	0.658	-1.7			0	0	0	0	0	0	0	41.9	20.2		80.42	0.61
42	1	0	57	0	25.2994	2	1	2	2	1	1	51	6	2.338	0.897	1.076	1.221	1.437	1.186	-0.1	1.271	1.7	0.973	-0.5			90	2	124	3	20	14	1	40.6	9.51		88.94	0.242
43	0	0	55	0	23.7332	2	2	3	1	1	1	48	7	2.302	0.726	0.75	0.828	0.82	0.783	-3.3	0.783	-1.8	0.755	-2			0	0	0	0	0	0	0	41.4	9.23		142.3	0.575
44	0	0	54	0	25.4	2	1	3	1	1	1	52	2	2.296	0.949	0.97	1.09	1.462	1.151	-0.4	0.965	-0.5	0.988	-0.4			0	0	0	0	0	0	0	44.7	18.58		66.7	0.312
45	1	0	54	0	33.7325	1	2	2	1	1	1	47	7	2.274	1.156	1.199	1.075	1.145	1.14	-0.4	0.97	-0.5	1.024	-0.1			84	2	136	2	16	14	1	41.8	20.74		82.6	0.369
46	1	0	53	0	25.2081	2	2	3	1	1	1	49	4	2.366	0.661	0.706	0.858	0.958	0.813	-3.1	0.789	-1.8	0.768	-1.9			88	2	102	3	24	14	1	35.7	13.89		70.41	0.45
47	0	0	58	0	22.2137	2	2	3	1	1	1	49	9	2.218	0.976	1.079	1.141	1.073	1.073	-1	0.691	-2.5	0.751	-2.1			0	0	0	0	0	0	0	42.6	34.61		66.08	0.342
48	1	0	56	0	23.9224	2	1	3	1	1	1	47	9	2.462	0.708	0.794	0.795	0.906	0.81	-3.1	0.665	-2.7	0.752	-2.1			86	3	316	3	25	19	2	39.9	23.05		100.5	0.097
49	0	0	53	0	19.6506	3	1	3	1	1	1	49	4	2.314	0.827	0.878	0.959	0.921	0.909	-2.4	0.77	-1.9	0.733	-2.2			0	0	0	0	0	0	0	42.8	22.55		96.11	0.427
50	1	0	55	0	27.5556	2	2	3	1	1	1	52	3	2.264	0.723	0.748	0.953	0.846	0.823	-3	0.85	-1.4	0.797	-1.7			96	2	176	3	23	14	1	44.3	15.7		63.98	0.396
51	1	0	55	0	24.977	2	1	3	2	1	1	51	4	2.268	0.968	0.915	1.058	1.199	1.042	-1.2	0.911	-0.9	0.914	-0.9			85	1	94	3	23	14	1	37.6	19.98		109.8	0.316
52	0	0	56	0	27.0552	2	1	3	1	1	1	52	4	2.208	0.852	0.751	0.829	0.907	0.842	-2.8	0.7	-2.4	0.656	-2.7			0	0	0	0	0	0	0	36.1	26.09		99.67	0.302
53	0	0	58	0	20.8117	2	1	3	2	1	1	51	7	2.342	0.71	0.679	0.695	0.823	0.736	-3.7	0.727	-2.2	0.697	-2.5			0	0	0	0	0	0	0	42.4	19.94		125.9	0.421
54	0	0	53	0	23.4375	1	2	2	1	1	1	50	3	2.41	0.929	0.921	1.022	1.104	1.004	-1.5	1.878	-1.2	0.864	-1.3			0	0	0	0	0	0	0	43.5	15.67		84.58	0.118
55	1	0	56	0	26.6667	2	1	2	1	1	1	50	6	2.36	0.786	0.853	0.928	0.787	0.837	-2.9	0.71	-2.4	0.743	-2.1			95	1	82	3	23	15	2	44	17.94		130.4	0.166
56	1	0	50	0	28.1337	2	2	2	1	1	1	48	2	2.442	0.934	0.942	1.002	1.008	0.976	-1.8	0.862	-1.3	0.786	-1.8			95	3	274	3	25	14	1	41.9	14.82		83.01	0.326
57	1	0	55	0	27.4077	1	1	3	1	1	1	50	5	2.38	0.804	1.015	1.064	1.119	1.012	-1.5	0.728	-2.2	0.75	-2.1			80	3	347	3	25	19	2	38.5	23		88.29	0.067
58	1	0	54	0	29.5858	2	2	3	1	1	1	49	5	2.31	0.984	1.129	1.158	1.258	1.143	-0.4	0.939	-0.7	0.907	-0.9			88	3	310	1	5	14	1	44	17.58		46.98	0.179
59	0	0	49	0	21.7784	3	1	3	1	1	1	47	2	2.306	0.676	0.792	0.749	0.753	0.745	-3.6	0.779	-1.9	0.811	-1.6			0	0	0	0	0	0	0	41.7	22.49		46.59	0.387
60	1	0	55	0	22.6409	2	1	3	2	1	1	52	3	2.362	0.836	0.858	0.982	0.921	0.903	-2.4	0.735	-2.2	0.777	-1.9			85	1	93	3	25	15	2	43.4	22.07		63.71	0.669
61	1	0	52	0	25.2994	1	2	2	1	1	1	47	5	2.348	1.133	1.012	1.208	1.251	1.161	-0.3	1.103	0.5	1.087	0.4			98	3	254	3	24	14	1	45.1	17.05		44.92	0.222
62	1	0	54	0	22.7615	2	1	3	1	1	1	52	2	2.334	0.951	0.949	1.061	1.05	1.01	-1.5	0.943	-0.7	0.932	-0.8			79	3	350	3	25	19	2	40.3	17.73		89.64	0.115
63	1	0	55	0	28.3039	2	1	3	2	1	1	50	5	2.324	0.901	0.912	1.019	0.961	0.952	-2	0.952	-0.6	0.904	-1			81	3	207	3	18	14	1	45.3	16.21		83.38	0.333
64	0	0	58	0	20.7612	2	1	3	1	1	1	48	10	2.368	0.695	0.761	0.85	0.883	0.805	-2.1	0.76	-2	0.728	-2.2			0	0	0	0	0	0	0	41.1	25.25		109.7	0.516
65	1	0	51	0	20.5457	2	2	2	1	1	1	50	1	2.482	0.966	0.988	1	1.065	1.009	-1.5	0.916	-0.9	0.928	-0.8			85	2	196	3	25	14	1	43.9	15.45		104.5	0.411
66	0	0	55	0	23.8054	2	2	3	1	1	1	52	3	2.318	0.892	0.795	0.917	1.009	0.903	-2.4	0.742	-2.1	0.776	-1.9			0	0	0	0	0	0	0	45.1	22.11		83.38	0.451
67	1	0	56	0	25.7778	2	1	3	1	1	1	48	8	2.35	0.919	0.965	0.941	1.062	0.955	-1.9	0.857	-1.3	0.791	-1.8			92	3	214	3	20	14	1	41	14.08		90.89	0.431
68	1	0	56	0	24.8358	1	2	2	1	1	1	53	3	2.348	0.832	0.902	0.908	0.851	0.873	-2.6	0.934	-0.8	0.773	-1.9			89	2	170	2	13	14	1	42.6	17.06		73.49	0.357
69	0	0	54	0	22.8269	3	1	3	2	1	1	52	2	2.336	0.779	0.764	0.793	0.831	0.796	-3.2	0.739	-2.2	0.744	-2.1			0	0	0	0	0	0	0	43.7	17.52		58.93	0.417
70	0	0	53	0	30.2519	2	1	3	1	1	1	50	3	2.452	1.052	1.063	1.118	1.065	1.076	-1	1.072	0.2	1.002	-0.3			0	0	0	0	0	0	0	39.9	16.71		55.94	0.138
71	0	0	54	0	27.3399	2	1	3	1	1	1	48	6	2.488	0.828	0.915	0.956	0.94	0.912	-2.3	0.706	-2.4	0.77	-1.9			0	0	0	0	0	0	0	47.6	15.91		33.65	0.126
72	1	0	52	0	24.8889	2	1	3	1	1	1	51	1	2.304	0.882	0.994	1.042	0.945	0.97	-1.8	0.832	-1.5	0.81	-1.6			84	1	53	3	21	19	2	40.8	14.35		68.65	0.349
73	1	0	56	0	24.4444	1	2	2	1	1	1	50	6	2.418	0.995	0.92	1.031	1.064	1.007	-1.5	0.883	-1.1	0.958	-0.6			89	2	106	3	24	15	2	43.1	15.94		88.02	0.768
74	1	0	54	0	25.8022	2	2	3	1	1	1	48	6	2.448	0.902	0.967	1.045	0.994	0.982	-1.7	0.793	-1.8	0.784	-1.8			97	1	92	3	24	14	1	41.6	12.02		40.97	0.517
75	1	0	54	0	23.4375	2	1	3	1	1	1	50	4	2.398	0.996	1.059	1.131	1.085	1.07	-1	0.958	-0.6	1.048	0.1			95	3	296	3	25	14	1	38.6	13.21		79.23	0.184
76	0	0	54	0	22.231	2	1	3	1	1	1	52	2	2.23	0.768	0.794	0.845	0.889	0.829	-2.9	0.789	-1.8	0.774	-1.9			0	0	0	0	0	0	0	40	25.44		124.7	0.538
77	1	0	56	0	38.0196	1	1	2	1	1	1	48	8	2.394		1.073	1.031	1.111	1.073	-1.2	0.961	-0.6	0.819	-1.6			86	1	63	3	24	14	1	38.8	13.31		145.2	0.479
78	1	0	54	0	25.3906	2	2	3	1	1	1	49	5	2.332	0.701	0.756	0.858	0.936	0.831	-2.9	0.901	-1	0.974	-0.5			98	3	285	2	14	14	1	38.9	19.04		104.2	0.808
79	1	0	55	0	23.7812	2	1	3	1	1	1	49	6	2.408	0.92	0.872	1.007	1	0.956	-1.9	1.052	0.1	0.94	-0.7			81	3	322	3	24	16	2	43.6	14.39		109.7	0.784
80	0	0	54	0	23.634	2	1	3	1	1	1	51	3	2.274	0.781	0.818	0.948	0.924	0.875	-2.6	0.688	-2.5	0.883	-1.1			0	0	0	0	0	0	0	42.3	11.26		103.5	0.564
81	1	0	49	0	22.2222	1	2	2	1	1	1	48	1	2.312	0.884	0.975	1.058	0.974	0.978	-1.8	0.893	-1	0.887	-1.1			81	1	84	3	22	14	1	38.9	10.8		54.55	0.166
82	1	0	53	0	27.4077	1	2	2	1	1	1	52	1	2.338	0.902	1.043	1.16	1.041	1.045	-1.2	0.884	-1.1	0.918	-0.9			87	2	193	2	9	14	1	42.1	16.29		59.91	0.285
83	1	0	52	0	22.0741	2	1	2	1	1	1	51	1	2.324	0.717	0.797	0.918	1.013	0.872	-2.6	0.683	-2.6	0.722	-2.3			94	3	267	3	21	14	1	36.8	16.41		91.06	0.359
84	1	0	56	0	29.7778	1	2	2	1	1	1	52	4	2.396	0.944	1.096	1.175	1.185	1.107	-0.7	0.692	-2.5	0.683	-2.6			84	2	187	3	19	14	1	42.7	26.17		117.2	0.274
85	1	0	57	0	24.974	2	1	2	1	1	1	50	7	2.326	0.837	1.232	1.351	1.061	1.109	-0.7	0.682	-2.6	0.715	-2.3			80	3	253	3	20	14	1	43.7	22.37		81.52	0.327
86	1	0	56	0	22.8269	2	2	3	1	1	1	50	6	2.49	0.818	0.761	0.817	0.831	0.809	-3.1	0.702	-2.4	0.98	-0.4			95	3	214	3	20	14	1	38	16.17		70.13	0.072
87	1	0	54	0	19.7239	1	2	2	1	1	1	48	6	2.348	0.788	0.824	0.915	0.923	0.874	-2.6	1.036	0	1.071	0.2			74	1	66	3	23	16	2	37.1	21.01		72.88	0.286
88	1	0	53	0	25.1096	1	2	2	1	1	1	49	4	2.476	0.853	0.9	0.977	1.148	0.853	0.9	0.977	1.148	0.973	-1.8			82	2	197	3	22	14	1	34.2	12.5		59.09	0.16
89	1	0	56	0	24.064	1	2	2	1	1	1	48	8	2.372	0.755	0.739	0.811	0.821	0.785	-3.3	0.693	-2.5	0.685	-2.5			81	3	268	3	23	14	1	41.9	13.36		170.4	0.134
90	0	0	55	0	22.8928	2	2	3	2	1	1	53	2	2.36	0.907	0.974	0.901	0.938	0.932	-2.1	0.705	-2.4	0.726	-2.2			0	0	0	0	0	0	0	41.5	20.29		82.52	0.556
91	0	0	51	0	22.7694	2	1	3	1	1	1	49	2	2.374	0.87	0.964	1.045	1.163	1.022	-1.4	0.893	-1	0.892	-1.1			0	0	0	0	0	0	0	40.8	22.92		41.68	0.537
92	1	0	56	0	20.5693	2	1	2	1	1	1	51	5	2.298	0.953	1.07	1.158	1.053	1.065	-1	0.933	-0.8	0.959	-0.6			86	3	273	3	17	14	1	42.1	22.22		69.77	0.236
93	1	0	56	0	22.1893	1	2	2	1	1	1	51	5	2.292	0.998	0.99	1.059	1.071	1.034	-1.3	0.917	-0.9	0.886	-1.1			85	2	194	3	19	15	2	42.9	15.7		55.32	0.217
94	1	0	53	0	24.6548	2	2	3	1	1	1	50	3	2.222		0.967	1.153	1.217	1.124	-0.7	0.993	-0.3	0.998	-0.3			88	3	235	3	18	16	2	44.4	21.61		72.44	0.407
95	1	0	56	0	26.6667	3	1	3	1	1	1	49	7	2.264	0.824	0.91	1.087	0.984	0.963	-1.9	0.809	-1.6	0.713	-2.3			96	3	344	3	23	14	1	40.8	26.29		57.25	0.341
96	0	0	55	0	23.7954	2	1	3	1	1	1	53	2	2.398	1.038	1.267	1.283	1.248	1.217	0.2	0.98	-0.4	1.1	0.4			0	0	0	0	0	0	0	41.1	25.81		60.83	0.143
97	0	0	57	0	27.3438	2	1	3	2	1	1	51	6	2.44	1.26	1.429	1.283	1.145	1.278	0.7	0.89	-1.1	0.927	-0.8			0	0	0	0	0	0	0	43	11.08		49.98	0.217
98	1	0	55	0	19.563	1	2	2	1	1	1	50	5	2.458	0.992	0.865	0.867	0.883	0.883	-2.5	0.74	-2.1	0.825	-1.5			95	3	334	3	23	17	2	43.6	12.39		96.85	0.245
99	1	0	56	0	25.4524	1	2	2	1	1	1	51	5	2.364	0.716	0.813	0.943	0.923	0.854	-2.8	0.669	-2.7	0.629	-2.9			81	3	291	3	24	14	1	36.3	14.1		97.56	0.359
100	1	0	53	0	26.2227	2	1	3	1	1	1	52	1	2.362	0.79	0.81	0.871	0.91	0.851	-2.8	1.009	-0.2	1.008	-0.2			86	2	164	3	24	14	1	37.9	20.19		83.6	0.317
101	1	0	55	0	25.9695	2	2	3	1	1	1	49	6	2.324	0.78	0.774	0.825	0.735	0.776	-3.4	0.789	-1.8	0.836	-1.4			88	3	335	3	24	14	1	39.3	15.46		135.4	0.542
102	1	0	53	0	31.25	2	1	3	1	1	1	48	5	2.342	0.768	0.696	0.889	0.91	0.822	-3	0.939	-0.7	0.997	-0.3			90	1	95	3	25	14	1	41.9	26.81		88.34	0.294
103	0	0	54	0	22.8329	2	1	3	2	1	1	50	4	2.266		0.56	0.563	0.654	0.598	-5	0.712	-2.3	0.647	-2.8			0	0	0	0	0	0	0	43.7	24.77		107	0.857
104	0	0	54	0	24.974	2	1	3	1	1	1	51	3	2.284	0.95	1.065	1.249	1.337	1.164	-0.2	0.993	-0.3	0.933	-0.8			0	0	0	0	0	0	0	43.8	16.77		37.37	0.095
105	0	0	55	0	20.7031	2	1	3	1	1	1	50	5	2.32	0.81	0.882	0.956	0.957	0.909	-2.3	0.727	-2.2	0.808	-1.7			0	0	0	0	0	0	0	42	18		97.59	0.336
106	0	0	54	0	26.6667	2	1	3	2	1	1	52	2	2.404	0.645	0.595	0.7	0.629	0.643	-4.5	0.824	-1.5	0.772	-1.9			0	0	0	0	0	0	0	42.3	20.77		123.4	0.662
107	0	0	54	0	22.0317	2	1	3	1	1	1	52	2	2.368	0.921	0.878	1.054	1.059	0.988	-1.7	0.7	-2.4	0.722	-2.3			0	0	0	0	0	0	0	42.6	21.72		110.2	0.174
108	1	0	56	0	24.974	2	2	2	1	1	1	49	7	2.304	0.959	0.984	1.055	1.09	1.027	-1.4	0.783	-1.8	0.769	-1.9			87	1	80	3	21	29	3	40.3	19.01		85.71	0.538
109	1	0	52	0	23.5556	1	2	2	1	1	1	51	1	2.368	1.005	0.99	1.034	1.065	1.026	-1.4	0.775	-1.9	0.814	-1.6			86	1	87	2	13	14	1	40.6	20.48		76.09	0.258
110	1	0	55	0	25.7778	1	2	2	1	1	1	52	3	2.412	0.901	1.121	1.159	1.045	1.063	-1.1	0.911	-0.9	0.866	-1.2			80	3	314	3	24	14	1	40.4	15.1		61.22	0.123
111	1	0	55	0	24	1	2	2	1	1	1	49	6	2.282	0.962	1.04	1.182	1.227	1.117	-0.6	0.847	-1.4	0.886	-1.1			73	2	115	3	19	20	2	39.9	19.41		85.49	0.438
112	1	0	57	0	29.3848	2	1	3	1	1	1	51	6	2.296	0.625	0.765	0.917	0.918	0.819	-3	0.988	-0.4	0.649	-2.8			83	2	162	3	23	15	2	41.2	18.81		70.57	0.351
113	1	0	56	0	22.6003	1	2	2	1	1	1	49	7	2.25	0.901	0.992	1.033	1.123	1.023	-1.4	1.019	-0.1	1.051	0.1			84	3	222	3	25	14	1	37.5	10.64		61.14	0.278
114	1	0	54	0	25.0657	2	2	3	1	1	1	50	4	2.326	0.784	0.846	0.938	1.041	0.912	-3.2			0.643	-2.8			87	2	180	3	23	14	1	36.7	16.21		42.2	0.148
115	1	0	52	0	27.5556	2	2	2	1	1	1	50	2	2.408	0.831	0.815	0.914	0.97	0.888	-2.5			0.836	-1.4			85	2	136	2	12	14	1	46.6	15		64.53	0.039
116	1	0	53	0	21.875	1	2	2	1	1	1	50	3	2.346	0.648	0.694	0.75	0.684	0.695	-4	0.795	-1.7	0.8	-1.7			87	3	311	1	2	17	2	39.7	27.25		116.6	0.967
117	1	0	54	0	23.1111	1	2	2	1	1	1	49	5	2.36	0.694	0.706	0.725	0.68	0.7	-4	0.647	-2.8	0.641	-2.9			83	2	122	2	15	19	2	42	10.02		62.26	0.299
118	1	0	53	0	22.4323	2	2	2	1	1	1	52	1	2.552	0.745	0.809	0.925	0.901	0.852	-2.8	0.769	-1.9	0.874	-1.2			99	2	136	3	23	17	2	38.9	15.92		72.88	0.213
119	1	0	54	0	24.5578	2	2	3	1	1	1	51	3	2.29	1.077	1.15	1.193	1.206	1.162	-0.3	1.058	0.1	0.98	-0.4			84	3	266	3	24	15	2	36.5	10.68		53.1	0.173
120	1	0	56	0	24.0346	2	1	3	1	1	1	52	4	2.326	0.754	0.801	0.804	0.851	0.87	-3.1	0.815	-1.6	0.68	-2.6			88	1	99	3	23	17	2	43.7	14.39		78.2	0.303
121	1	0	53	0	21.3333	2	1	3	1	1	1	51	2	2.448	0.844	0.926	0.999	0.966	0.938	-2.1	0.59	-3.2	-0.589	-3.2			82	1	85	2	13	14	1	40.6	10.19		142.8	0.43
122	0	0	58	0	30.0801	2	1	3	1	1	1	51	7	2.25	0.67	0.79	0.834	0.716	0.759	-3.5	0.629	-2.9	0.665	-2.7			0	0	0	0	0	0	0	38.5	20.22		94.52	0.387
123	0	0	53	0	22.2656	2	1	3	2	1	1	51	2	2.442	0.987	1.074	1.144	1.197	1.107	-0.7	1.173	1	1.005	-0.2			0	0	0	0	0	0	0	46.9	23.63		57.55	0.224
124	1	0	55	0	23.1481	1	2	2	1	1	1	48	7	2.294	0.732	0.83	0.816	0.843	0.812	-3	0.629	-2.9					75	3	283	2	16	14	1	40.8	22.36		71.48	0.303
125	0	0	58	0	24.0344	2	2	3	2	1	1	50	8	2.32	0.886	0.897	0.947	0.964	0.928	-2.2	0.862	-1.3	0.864	-1.3			0	0	0	0	0	0	0	43	18.62		53.69	0.454
126	1	0	55	0	22.4323	1	2	3	1	1	1	49	6	2.386	0.744	0.803	0.861	0.977	0.858	-2.7	0.759	-2	0.782	-1.8			85	3	302	3	24	14	1	41.2	13.18		94.13	0.06
127	1	0	54	0	24.1288	2	1	3	1	1	1	52	2	2.426	1.049	1.095	1.15	1.053	1.088	-0.9	0.931	-0.8	0.943	-0.7			82	3	295	3	23	14	1	43.2	22.05		154.6	0.654
128	0	0	55	0	23.1111	2	2	3	2	1	1	50	5	2.356	0.961	1.048	1.16	1.02	1.047	-1.2	0.797	-1.7	0.789	-1.8			0	0	0	0	0	0	0	43.2	17.07		60.13	0.22
129	1	0	51	0	24.4444	1	2	2	1	1	1	47	4	2.326	0.841	0.779	0.834	0.844	0.825	-3	0.972	-0.5	0.753	-2.1			85	1	95	3	22	14	1	43.2	20.72		59.63	0.081
130	1	0	52	0	23.3091	1	2	3	1	1	1	50	2	2.256	0.758	0.825	0.957	0.884	0.865	-2.7	0.793	-1.8	0.791	-1.8			94	3	258	3	24	14	1	39.2	8.15		96.67	0.327
131	0	0	54	0	21.6713	2	1	3	1	1	1	53	1	2.314	0.917	1.065	1.127	1.12	1.064	-1.1	0.834	-1.5	0.911	-0.9			0	0	0	0	0	0	0	39.3	20.65		78.08	0.048
132	1	0	54	0	27.0258	2	1	3	1	1	1	50	4	2.304	0.969	1.041	1.039	1.048	1.027	-1.4	0.787	-1.8	0.808	-0.7			87	1	53	2	11	14	1	40.8	19.02		91.36	0.261
133	1	0	56	0	28	2	1	2	2	1	1	48	8	2.274	0.98	1.168	1.173	1.073	1.101	-0.8	0.981	-0.4	1.036	0			92	1	97	3	19	16	2	42.8	14.58		95.8	0.484
134	1	0	55	0	27.1816	1	2	2	1	1	1	48	7	2.24	0.832	0.885	0.934	1.014	0.923	-2.2	0.867	-1.2	0.88	-1.1			82	2	176	3	19	14	1	41.5	12.45		140.7	0.342
135	0	0	54	0	21.875	3	2	3	1	1	1	51	3	2.36	0.914	0.846	0.857	0.989	0.903	-2.4	0.821	-1.6	0.751	-2.1			0	0	0	0	0	0	0	41	19.98		127.5	0.323
136	1	0	54	0	28.4444	1	2	2	1	1	1	52	2	2.358	0.952	1.097	1.146	1.126	1.09	-0.8	0.886	-1.1	0.925	-0.8			88	3	216	3	22	14	1	41.1	10.79		73.47	0.166
137	1	0	51	0	33.4252	2	1	3	1	1	1	48	3	2.324	0.992	1.009	1.21	1.331	1.152	-0.3	0.919	-0.9	1.039	0			91	1	67	3	24	14	1	46.8	10.74		53.68	0.123
138	0	0	54	0	20.3954	2	2	3	1	1	1	50	4	2.304	0.88	0.9	1.013	1.154	0.994	-1.6	0.799	-1.7	0.825	-1.5			0	0	0	0	0	0	0	41.3	11.99		113.6	0.499
139	0	0	52	0	23.0112	3	1	3	1	1	1	50	2	2.278	0.966	0.944	1.091	0.98	0.995	-1.6	0.826	-1.5	0.8	-1.7			0	0	0	0	0	0	0	42.1	11.91		62.14	0.082
140	1	0	56	0	25.6312	1	2	2	1	1	1	47	9	2.354		0.842	1.073	1.148	1.029	-1.5	0.8	-1.7	0.788	-1.8			82	3	214	3	23	14	1	40.8	19.24		76.13	0.292
141	1	0	48	0	22.6003	1	1	3	1	1	1	48	0	2.276	1.227	1.308	1.258	1.337	1.287	0.7	0.921	-0.8	0.904	-1			83	1	77	3	24	14	1	36.7	12.07		87.29	0.276
142	0	0	54	0	20.9566	1	2	2	1	1	1	49	5	2.378	0.825	0.803	0.852	0.963	0.871	-2.6	0.706	-2.4	0.703	-2.4			0	0	0	0	0	0	0	43.6	27.59		72.22	0.194
143	1	0	54	0	22.6003	1	2	2	1	1	1	50	4	2.286	1.065	1.181	1.316	1.3	1.228	0.3	0.683	-2.6	0.862	-1.3			98	3	307	3	23	14	1	39.2	7.83		59.73	0.341
144	0	0	55	0	33.3319	2	1	3	1	1	1	49	6	2.29	0.803	0.832	0.923	1.073	0.925	-2.2	0.742	-2.4	0.842	-1.4			0	0	0	0	0	0	0	39.5	22.26		51.65	0.289
145	1	0	54	1	26.449	2	2	3	1	1	2			2.428	1.201	1.362	1.415	1.377	1.347	0.9	1.137	0.7	1.364	2.4			60	1	60	3	23	16	2	44.6	20.07		50.22	0.134
146	1	0	54	1	32.0312	2	2	3	1	1	2			2.254	0.98	1.095	1.089	1.03	1.051	-1.5	1.02	-0.4	1.007	-0.5			83	1	50	3	25	14	1	40.8	24.67		51.1	0.19
147	1	0	51	1	29.4118	3	2	3	2	1	2			2.232	1.032	1.148	1.22	1.248	1.17	-0.5	0.985	-0.7	0.987	-0.6			85	1	75	3	21	46	3	44.9	24.34		38.24	0.144
148	0	0	51	1	26.6749	3	2	3	1	1	2			2.362	0.968	1.067	1.109	1.111	1.069	-1.3	0.895	-1.3	0.872	-1.5			0	0	0	0	0	0	0	44.9	31.21		55	0.157
149	0	0	53	1	25.5296	2	2	3	1	1	2			2.296	0.929	1.1	1.15	1.083	1.07	-1.3	0.794	-2.1	0.773	-2.3			0	0	0	0	0	0	0	41.2	31.55		71.64	0.153
150	0	0	51	1	24.3141	3	2	3	2	1	2			2.306	1.068	1.051	1.075	1.049	1.06	-1.4	0.819	-1.9	0.93	-1			0	0	0	0	0	0	0	49.2	28.57		97.61	0.077
151	1	0	54	1	20.7612	3	2	3	1	1	2			2.328	0.741	0.852	0.988	1.009	0.903	-2.7	0.831	-1.8	0.774	-2.3			91	3	249	3	22	14	1	42.1	28.66		125.9	0.59
152	1	0	55	1	25.7117	2	2	3	1	1	2			2.324		0.875	0.907	1.006	0.932	-2.6	0.733	-2.6	0.756	-2.4			97	2	171	3	23	16	2	38.8	24.68		77.88	0.285
153	0	0	50	1	23.7118	2	2	3	2	1	2			2.36	0.976	1.053	1.067	1.035	1.035	-1.4	0.865	-0.9	0.796	-1.5			0	0	0	0	0	0	0	43	29.43		37.17	0.268
154	0	0	52	1	20.7157	2	2	3	1	1	2			2.316	1.067	1.079	1.089	1.014	1.059	-1.4	0.943	-1	1.264	1.5			0	0	0	0	0	0	0	43.2	26.38		53.06	0.322
155	0	0	55	1	21.2585	2	1	3	1	1	2			2.436	0.895	0.962	0.99	0.911	0.94	-2.4	0.866	-1.5	0.951	-0.9			0	0	0	0	0	0	0	46.7	18.74		120.2	0.692
156	1	0	54	1	24.5089	2	2	3	1	1	2			2.32	0.979	1.069	1.083	1.059	1.05	-1.5	0.953	-0.9	0.851	-1.7			97	2	112	3	22	14	1	42.5	18.85		33.53	0.045
157	1	0	54	1	21.875	2	2	3	1	1	2			2.216	0.87	0.932	1.131	1.007	1.011	-1.8	0.842	-1.8					96	2	160	3	24	14	1	41.2	20.72		26.21	0.205
158	0	0	53	1	27.2173	3	2	3	1	1	2			2.334	0.825	0.924	0.934	0.893	0.894	-2.8	0.81	-2	0.825	-1.9			0	0	0	0	0	0	0	43.8	23.73		68.72	0.389
159	0	0	51	1	35.1562	2	2	3	1	1	2			2.208	1.096	1.158	1.283	1.137	1.172	-0.5	1.154	0.6	1.114	0.3			0	0	0	0	0	0	0	41.6	52.7		38.88	0.21
160	1	0	53	1	24.0055	2	2	3	1	1	2			2.266	0.991	0.979	1.089	1.152	1.062	-1.4	0.817	-1.9	0.829	-1.9			97	1	67	1	2	20	2	43.2	33.21		48.66	0.23
161	1	0	54	1	21.4844	2	2	3	1	1	2			2.4	0.841	0.786	0.924	0.935	0.878	-2.9	0.759	-2.4	0.792	-2.1			83	3	313	3	24	15	2	39	24.09		94.26	0.322
162	1	0	52	1	21.2585	2	2	2	1	1	2			2.326	0.755	0.83	0.935	0.963	0.877	-2.9	0.952	-0.8	0.818	-1.9			80	1	66	3	26	14	1	44.2	17.24		71.36	0.165
163	0	0	52	1	19.9594	2	2	3	1	1	2			2.256	0.812	0.809	0.793	0.904	0.833	-3.3	0.785	-2.2	0.84	-1.8			0	0	0	0	0	0	0	40.2	40.68		68.85	0.136
164	1	0	53	1	24.7676	2	2	3	1	1	2			2.352	1.106	1.116	1.25	1.26	1.19	-0.4	0.923	-1.1	0.905	-1.3			87	2	108	3	23	15	2	40.9	16.29		74.17	0.475
165	0	0	55	1	23.6244	2	2	3	1	1	2			2.194	0.828	0.849	0.855	0.778	0.825	-3.3	0.736	-2.6	0.715	-2.7			0	0	0	0	0	0	0	44.3	54.1		76.21	0.102
166	1	0	56	1	25.3906	1	1	2	1	1	2			2.356	1.204	1.23	1.236	1.404	1.276	0.3	0.949	-0.9	0.947	-0.9			82	2	104	3	24	15	2	42.2	30.67		51.15	0.424
167	0	0	53	1	19.9184	2	2	3	1	1	2			2.332	1.061	1.164	1.307	1.361	1.234	0	0.073	0.1	1.138	0.6			0	0	0	0	0	0	0	43.4	25.52		61.78	0.241
168	0	0	52	1	26.9531	2	2	2	2	1	2			2.272	1.01	1.209	1.271	1.195	1.176	-0.5	0.829	-1.9	0.803	-2.1			0	0	0	0	0	0	0	41.4	54.93		105.5	0.353
169	0	0	55	1	23.7954	2	2	3	1	1	2			2.238	0.951	1.078	1.15	1.09	1.068	-1.4	0.985	-0.7	0.9	-1.3			0	0	0	0	0	0	0	45.6	31.36		76.98	0.292
170	0	0	52	1	27.1809	2	2	3	1	1	2			2.242	1.172	1.186	1.163	1.122	1.158	0.6	0.832	1.6	0.831	1.6			0	0	0	0	0	0	0	44.4	24.95		50.74	0.224
171	1	0	53	1	25.3906	2	2	2	1	1	2			2.194	0.904	0.941	0.917	1.029	0.951	-2.3	0.893	-1.4	0.904	-1.3			94	2	189	3	24	14	1	39.8	22.99		45.48	0.158
172	1	0	51	1	18.9388	2	2	3	1	1	2			2.288	1.033	0.989	0.961	1.066	1.012	-1.8	0.918	-1.2	0.961	-0.8			86	2	129	3	23	14	1	42.1	21.63		49.17	0.428
173	1	0	53	1	26.0276	2	2	3	1	1	2			2.302	1.018	1.088	1.023	1.163	1.124	-0.9	0.888	-1.4	0.853	-1.7			92	1	78	3	23	14	1	44.4	25.95		64.25	0.281
174	0	0	54	1	31.5617	1	1	2	1	1	2			2.282		1.359	1.371	1.37	1.367	0.9	0.906	-1.3	1.07	0			0	0	0	0	0	0	0	39.9	26.76		64.6	0.236
175	0	0	51	1	25.7276	3	2	3	2	1	2			2.336	1.02	1.118	1.169	1.116	1.109	-1	1.013	-0.4	0.912	-1.2			0	0	0	0	0	0	0	41.7	26.51		42.31	0.347
176	0	0	53	1	24.677	2	2	2	1	1	2			2.452	0.752	0.795	0.882	0.821	0.815	-3.2	0.74	-1.8	0.788	-1.4			0	0	0	0	0	0	0	44.9	23.69		59.5	0.134
177	1	0	52	1	18.6851	2	2	3	1	1	2			2.312	0.938	0.964	1.04	1.208	1.051	-1.5	0.712	-2.8	1.025	-0.3			90	1	57	3	24	14	1	39.9	25.5		35.79	0.24
178	0	0	51	1	22.4913	2	3	3	1	1	2			2.378	0.908	0.855	0.95	0.944	0.917	-2.6	0.892	-1.4	0.937	-1			0	0	0	0	0	0	0	43.1	29.83		57.27	0.186
179	0	0	53	1	20.2812	2	2	3	1	1	2			2.376	0.815	0.934	0.994	1.087	0.969	-2.2	0.993	-0.4	0.857	-1.4			0	0	0	0	0	0	0	44.7	53.05		117.2	0.494
180	1	0	54	1	20.7612	2	2	3	1	1	2			2.294	0.813	0.87	0.93	1.037	0.921	-2.5	0.788	-2.2	0.939	-1			87	2	179	3	23	15	2	41.8	22.21		54.65	0.323
181	1	0	52	1	23.4375	2	2	3	1	1	2			2.368	0.841	0.906	0.99	1.127	0.976	-2.1	0.843	-1.7	0.778	-2.2			78	1	99	3	22	14	1	41.1	28.22		87.8	0.442
182	1	0	56	1	22.5896	2	2	3	1	1	2			2.296	0.883	1.042	1.023	1.1	1.02	-1.7	0.829	-1.9	0.842	-1.8			98	1	63	2	10	63	3	41.2	27.1		63.2	0.287
183	1	0	52	1	19.0311	2	2	3	1	1	2			2.256	0.884	0.998	1.145	1.16	1.059	-1.4	1.009	-0.3	0.901	-1.1			94	1	70	3	23	14	1	40.2	29.43		80.04	0.22
184	1	0	55	1	32.8731	3	2	3	1	1	2			2.356	0.921	0.783	0.818	0.917	0.863	-3	0.859	-1.5	0.814	-1.8			88	2	123	3	23	14	1	45.7	25.46		82.14	0.326
185	1	0	52	1	21.5645	2	2	3	1	1	2			2.306	1.03	1.079	1.085	1.044	1.06	-1.4	0.863	-1.6	0.901	-1.3			88	2	189	3	25	14	1	42.7	24.13		83.86	0.368
186	1	0	53	1	30.1103	2	2	2	1	1	2			2.3	1.121	1.1	1.294	1.189	1.181	-0.4	1.12	0.4					82	1	98	3	22	15	2	42.5	17.12		71.2	0.219
187	0	0	51	1	25.6055	2	1	3	1	1	2			2.42	0.978	0.943	1.055	1.121	1.029	-1.7	0.955	-0.8	1.044	-0.2			0	0	0	0	0	0	0	46	17.28		61.98	0.445
188	0	0	50	1	29.0174	2	2	2	1	1	2			2.238	0.874	0.958	1.005	0.908	0.943	-2.2	1.16	1.3	1.118	1			0	0	0	0	0	0	0	43.6	25.85		90.97	0.443
189	1	0	50	1	21.5139	2	2	3	1	1	2			2.348	0.83	0.941	0.994	0.942	0.932	-2.3	0.299	-5.3	0.308	-5.2			85	2	135	2	14	44	3	40.6	10.57		82.3	0.296
190	1	0	54	1	22.6003	1	2	2	1	1	2			2.316	0.978	1.112	1.206	1.309	1.162	-0.6	0.907	-1.3	0.934	-1			98	3	274	3	24	14	1	43.7	24.18		43.32	0.28
191	1	0	54	1	27.5482	2	2	2	1	1	2			2.268	0.963	1.107	1.238	1.233	1.145	-0.7	1.025	-0.3	1.095	0.2			98	1	72	2	10	55	3	43.1	37.29		66.53	0.362
192	1	0	53	1	27.3438	2	2	3	1	1	2			2.406	0.904	1.082	1.06	0.935	0.995	-1.9	0.925	-1.1					85	2	191	2	12	14	1	46.2	27.82		78.49	0.345
193	1	0	50	1	20.6852	2	2	3	1	1	2			2.31	0.972	1.033	1.17	1.232	1.109	-0.8	1.066	0.6	1.202	1.7			94	3	204	3	22	14	1	39	38.36		28.65	0.371
194	1	0	53	1	22.4913	2	3	3	1	1	2			2.266	0.991	1.124	1.083	1.141	1.091	-1.2	0.909	-1.2	1.072	0			83	3	292	3	22	14	1	43.2	15.43		87.54	0.451
195	1	0	50	1	22.4913	2	2	2	1	1	2			2.386	0.94	0.887	0.866	0.877	0.891	-2.6	1.118	1	1.076	0.7			95	2	107	2	10	14	1	41.2	29.82		99.18	0.175
196	1	0	56	1	26.6728	2	2	3	1	1	2			2.33	1.08	1.198	1.117	1.174	1.114	-0.7	1.036	-0.3	1.023	-0.4			86	3	338	3	22	14	1	43.5	18.14		54.07	0.344
197	0	0	54	1	20.7612	2	2	3	1	1	2			2.334	0.845	0.991	1.025	1.001	0.973	-2.1	0.871	-1.4	0.875	-1.4			0	0	0	0	0	0	0	42.3	38.05		99.9	0.721
198	1	0	52	1	29.3848	2	2	3	1	1	2			2.27	1.081	1.049	1.183	1.241	1.146	-0.7	0.997	-0.6	0.992	-0.6			89	1	82	2	10	16	2	40	14.14		79.36	0.144
199	1	1	57	0	32.1	2	2	2	1	1	1	53	4												0.355	-4.11	75	2	134	3	24	15	2	44.5	5.76	55.77	50.72	0.197
200	1	1	55	1	27.6	2	2	2	1	1	0														0.737	-1.37	90	1	23	2	11	17	2	45	10.76	21.02	27.7	0.065
201	0	1	54	1	23.8	3	3	3	1	1	0														0.567	-2.9	83	0	0	0	0	0	0	49.2	15.36	33.6	66.2	0.143
202	0	1	51	1	18	2	2	3	1	1	0														0.539	-3.16	77	0	0	0	0	0	0	47.5	19.2	26.17	33.25	0.171
203	1	1	51	0	24.1	2	1	2	1	1	1	49	2												0.412	-3.48	78	1	73	3	23	14	1	38	8.93	32.1	120.1	0.377
204	0	1	52	0	27.1	3	2	3	1	1	1	49	3												0.336	-4.98	80	0	0	0	0	0	0	43.2	11.42	17.85	46.03	0.144
205	0	1	52	0	26.7	3	2	3	1	1	1	49	3												0.21	-5.7	78	0	0	0	0	0	0	43.5	8.63	50.33	40.13	0.495
206	1	1	51	1	24.6	2	2	2	1	1	0														0.566	-2.91	75	1	12	1	4	183	3	44	18.79	40.35	40.53	0.189
207	0	1	50	1	28	3	2	3	1	1	0														0.739	-1.36	79	0	0	0	0	0	0	48.4	14.44	45.29	86.34	0.247
208	0	1	50	1	25.4	1	2	1	1	1	0														0.68	-1.89	78	0	0	0	0	0	0	48	13.43	28.77	71.03	0.13
209	0	1	54	1	22.2	3	3	3	1	1	0														0.585	-2.75	78	0	0	0	0	0	0	44.2	20.75	38.15	72.69	0.397
210	0	1	52	1	23.6	3	2	3	1	1	0														1.154	2.37	72	0	0	0	0	0	0	45.3	15.27	65.3	90.25	0.658
211	1	1	50	0	24.4	2	2	2	1	1	1	46	4												0.362	-4.75	75	1	34	3	24	14	1	42.3	5.59	59.65	97.38	0.593
212	0	1	53	0	25.7	3	1	3	1	1	1	50	3												0.451	-3.06	82	0	0	0	0	0	0	42.5	14.18	19.32	102.9	0.346
213	1	1	52	1	24	2	2	2	1	1	0														0.403	-4.38	79	1	30	3	24	16	2	40.2	8.56	23.39	61.76	0.269
214	1	1	57	0	22.2	2	2	2	1	1	1	52	5												0.276	-4.98	76	2	120	3	24	14	1	42.6	4.92	37.25	47.64	0.447
215	0	1	52	0	28.4	3	2	3	1	1	1	48	4												0.369	-3.95	75	0	0	0	0	0	0	45.8	8.89	20.13	12.21	0.07
216	0	1	53	0	41.1	3	1	3	1	1	1	52	1												0.528	-2.22	75	0	0	0	0	0	0	48.4	14.44	45.29	86.34	0.247
217	1	1	50	0	31.1	2	2	2	1	1	1	48	2												0.419	-3.41	77	2	154	3	20	17	2	45.2	2	40.61	31.49	0.078
218	1	1	55	1	29.4	2	2	2	1	1	0														0.573	-2.85	81	3	256	3	23	17	2	40.2	10.58	103.87	151.1	0.266
219	1	1	52	0	26.4	3	1	2	1	1	1	51	1												0.42	-3.4	75	3	241	3	23	14	1	40.9	6.26	34.12	60.07	0.199
220	1	1	54	0	21.5	2	2	2	1	1	1	44	10												0.438	-3.2	79	1	37	3	21	15	2	37.3	7.63	57.11	638.8	0.873
221	1	1	54	0	28.8	2	2	2	1	1	1	50	4												0.473	-2.82	80	1	16	2	12	14	1	45.7	5.85	59.12	49.54	0.332
222	0	1	53	0	26.6	3	2	3	1	1	1	50	3												0.446	-3.11	79	0	0	0	0	0	0	46.6	11.25	79.77	83.43	0.32
223	1	1	50	0	24	3	2	3	1	1	1	46	4												0.5	-2.52	78	1	10	1	3	48	3	45.3	4.87	32.33	33.16	0.188
224	1	1	57	0	31.1	3	1	3	1	1	1	50	7												0.392	-3.7	78	3	203	3	24	14	1	40.3	4.8	65.54	39.99	0.221
225	1	1	57	0	32.5	3	1	3	1	1	1	50	7												0.345	-4.21	78	1	85	3	23	14	1	43.6	4.61	46.53	74.98	0.429
226	0	1	52	0	21.8	2	2	3	1	1	1	49	3												0.379	-3.84	75	0	0	0	0	0	0	43.8	7.28	47.97	43.71	0.32
227	1	1	56	0	27.1	3	2	3	1	1	1	55	1												0.45	-3.07	76	1	45	2	12	14	1	34.4	6.71	154.74	66.97	0.349
228	0	1	50	1	22.2	3	2	3	1	1	0														0.883	-0.07	80	0	0	0	0	0	0	43.9	19.34	37.11	11.56	0.183
229	1	1	54	0	22	2	2	2	1	1	1	49	5												0.272	-5.02	79	3	215	3	21	15	2	43.9	5.54	60.41	72.59	0.292
230	0	1	50	1	28	3	3	3	1	1	0														1.187	2.67	87	0	0	0	0	0	0	47.7	21.64	54.22	64.25	0.422
231	0	1	55	1	26.9	3	3	2	1	1	0														0.81	-0.72	77	0	0	0	0	0	0	46.5	28.46	19.12	37.65	0.099
232	0	1	52	1	22.3	3	1	2	1	1	0														0.664	-2.03	80	0	0	0	0	0	0	42.2	15.34	91.81	51.11	0.468
233	0	1	54	1	24.6	2	3	3	1	1	0														0.75	-1.26	78	0	0	0	0	0	0	45.1	13.29	48.18	50.03	0.321
234	1	1	56	1	28.1	2	2	2	1	1	0														0.641	-2.24	84	2	127	3	24	14	1	43.9	9.7	46.26	112.3	0.53
235	0	1	53	0	28.2	3	2	2	1	1	1	51	2												0.283	-4.89	78	0	0	0	0	0	0	48	13.43	28.77	71.03	0.13
236	0	1	50	1	25.8	3	2	3	1	1	0														0.702	-1.69	80	0	0	0	0	0	0	48	13.43	28.77	71.03	0.13
237	0	1	52	1	23.4	3	3	3	1	1	0														0.824	-0.59	76	0	0	0	0	0	0	43.9	19.34	37.11	11.56	0.183
238	0	1	53	0	23	3	3	3	1	1	1	51	2												0.472	-3.76	80	0	0	0	0	0	0	46.9	10.61	29.54	53.01	0.131
239	0	1	54	0	22.4	3	2	3	1	1	1	48	6												0.434	-3.24	76	0	0	0	0	0	0	42	12.28	34.21	76.68	0.28
240	0	1	54	0	27.3	1	2	2	1	1	1	48	6												0.324	-4.45	76	0	0	0	0	0	0	43.9	9.24	26.18	79.03	0.473
241	1	1	53	0	24.7	2	2	2	1	1	1	52	1												0.399	-3.63	79	1	17	3	17	14	1	40.1	5.72	40.49	100.5	0.341
242	1	1	57	0	25.4	3	1	2	1	1	1	55	2												0.391	-3.72	76	1	88	3	24	14	1	44.3	2	198.96	137	0.488
243	1	1	54	0	31.1	2	2	3	1	1	1	47	7												0.538	-3.17	79	3	272	3	24	14	1	41.6	9.64	39.35	54.56	0.298
244	0	1	55	0	25	3	2	3	1	1	1	48	7												0.454	-3.03	76	0	0	0	0	0	0	44.6	6.14	77.15	65.49	0.568
245	0	1	54	1	21.3	3	3	3	1	1	0														0.605	-2.56	80	0	0	0	0	0	0	45.5	15.95	16.31	46.63	0.112
246	1	1	55	1	25.8	2	2	2	1	1	0														0.576	-2.82	78	2	127	3	24	14	1	41.5	8.41	58.62	67.79	0.405
247	0	1	50	1	28.1	3	2	3	1	1	0														0.546	-3.09	77	0	0	0	0	0	0	47.5	19.2	26.17	33.25	0.171
248	0	1	52	1	28.6	2	2	1	1	1	0														0.955	0.59	80	0	0	0	0	0	0	47.7	25.39	17.81	70.89	0.466
249	1	1	58	1	24.7	2	2	2	1	1	0														0.869	-0.19	72	1	36	3	19	14	1	42.7	11.4	11.76	35.87	0.159
250	1	1	57	0	26.3	2	2	2	1	1	1	54	3												0.336	-4.32	76	2	147	3	24	14	1	44.6	6.18	39.12	66.71	0.229
251	1	1	55	0	24.1	2	2	2	1	1	1	49	6												0.354	-4.12	80	1	12	1	7	128	3	48.3	5.66	56.37	81.08	0.383
252	0	1	53	0	28.7	3	2	2	1	1	1	50	3												0.269	-5.06	74	0	0	0	0	0	0	46.7	12.94	46.5	50.67	0.603
253	0	1	52	1	27.3	3	2	3	1	1	0														0.535	-3.19	79	0	0	0	0	0	0	46	14.78	43.96	65.27	0.425
254	0	1	50	0	28.9	3	2	2	1	1	1	47	3												0.608	-1.33	75	0	0	0	0	0	0	42.9	8.43	30.74	68.76	0.403
255	0	1	52	0	27.6	3	2	3	1	1	1	50	2												0.373	-3.91	76	0	0	0	0	0	0	45.6	17.42	27.85	100.2	1.2
256	0	1	52	1	20.2	3	3	3	1	1	0														0.612	-2.5	79	0	0	0	0	0	0	49.2	15.36	33.6	66.2	0.143
257	0	1	55	0	23.8	2	2	3	1	1	1	48	7												0.466	-2.89	77	0	0	0	0	0	0	48.2	16.73	37.6	59.81	0.522
258	1	1	55	0	22.1	3	2	3	1	1	1	50	5												0.358	-4.07	75	1	77	3	23	14	1	42.7	9.29	30.55	83.01	0.477
259	1	1	51	0	27.6	2	2	2	1	1	1	50	1												0.605	-1.37	75	3	278	2	15	14	1	42.2	2	60.38	42.47	0.157
260	0	1	54	0	27.1	3	2	3	1	1	1	52	2												0.401	-3.61	74	0	0	0	0	0	0	46.5	28.46	19.12	37.65	0.099
261	0	1	50	0	25.8	3	1	3	1	1	1	48	2												0.421	-3.39	76	0	0	0	0	0	0	45.5	9.1	22.85	36.98	0.17
262	1	1	54	0	22.9	2	2	2	1	1	1	53	1												0.5	-2.52	79	2	174	3	24	14	1	41.5	6.74	40.7	28.51	0.309
263	1	1	53	0	30	2	2	2	1	1	1	52	1												0.354	-4.12	77	3	267	3	24	14	1	41.3	5.78	39.47	63.5	0.584
264	1	1	53	0	31.4	2	2	2	1	1	1	42	11												0.619	-1.22	73	1	71	3	23	15	2	41.9	5.59	53.17	56.92	0.253
265	0	1	50	1	24.8	3	2	2	1	1	0														1.254	3.27	75	0	0	0	0	0	0	48.4	21.33	56.84	68.21	0.449
266	0	1	51	0	32.9	3	2	3	1	1	1	49	2												0.828	1.08	76	0	0	0	0	0	0	46.6	10.66	28.03	66.94	0.242
267	0	1	54	1	25.4	3	2	3	1	1	0														0.793	-0.87	80	0	0	0	0	0	0	47.7	25.39	17.81	70.89	0.466
268	0	1	52	1	21	3	2	3	1	1	0														0.644	-2.21	83	0	0	0	0	0	0	44.2	20.75	38.15	72.69	0.397
269	0	1	51	1	30.9	3	3	3	1	1	0														0.906	0.14	76	0	0	0	0	0	0	45	12.09	22.59	47.23	0.145
270	0	1	53	1	30.5	3	2	3	1	1	0														0.917	0.25	85	0	0	0	0	0	0	48.4	21.33	56.84	68.21	0.449
271	1	1	52	1	19.1	2	2	2	1	1	0														0.467	-3.8	78	1	49	3	24	14	1	44.4	10.89	51.87	57.16	0.302
272	1	1	50	0	22.2	2	2	2	1	1	1	45	5												0.152	-6.33	71	1	9	1	5	14	1	42.5	6.81	46.38	76.55	0.213
273	0	1	55	1	23.7	3	2	1	1	1	0														0.474	-3.74	80	0	0	0	0	0	0	45.9	14.96	58.97	33.5	0.254
274	0	1	52	1	28.4	3	3	3	1	1	0														0.802	-0.79	78	0	0	0	0	0	0	43.9	15.5	35.08	43.26	0.282
275	1	1	57	0	33.3	2	2	2	1	1	1	50	7												0.463	-2.92	75	3	263	3	24	14	1	40.6	2	75.66	52.9	0.25
276	0	1	52	0	22	3	2	2	1	1	1	50	2												0.486	-2.68	80	0	0	0	0	0	0	44.9	13.43	30.31	66.97	0.25
277	1	1	57	1	24.2	2	2	2	1	1	0														0.634	-2.3	81	3	283	3	19	14	1	45.9	11.17	52.91	67.72	0.476
278	1	1	51	1	29.3	2	2	2	1	1	0														0.835	-0.5	74	3	230	2	13	14	1	48.2	10.76	38.76	37.51	0.13
279	1	1	54	0	23.4	2	2	2	1	1	1	52	2												0.522	-2.28	81	1	92	3	24	14	1	45.2	5.73	36.91	47.07	0.184
280	0	1	51	0	25.8	3	2	2	1	1	1	48	3												0.324	-4.45	79	0	0	0	0	0	0	42.5	10.46	40.23	116.8	0.386
281	0	1	53	0	48.3	3	2	3	1	1	1	49	4												0.58	-1.65	79	0	0	0	0	0	0	42.5	14.18	19.32	102.9	0.346
282	0	1	51	0	23.7	3	2	3	1	1	1	48	3												0.52	-2.3	80	0	0	0	0	0	0	46	16.34	33	27.09	0.124
283	0	1	50	0	35.7	3	2	3	1	1	1	48	2												0.593	-1.5	78	0	0	0	0	0	0	43.7	15.97	44.13	61.96	0.2
284	1	1	50	0	23	2	2	2	1	1	1	48	2												0.579	-1.66	78	1	38	3	20	20	2	46.6	6.38	36.03	43.99	0.289
285	1	1	53	0	26.7	2	2	2	1	1	1	51	2												0.339	-4.96	79	3	219	2	13	14	1	46	5.39	48.97	56.09	0.209
286	0	1	55	0	26.6	2	2	1	1	1	1	49	6												0.26	-5.15	79	0	0	0	0	0	0	43.2	11.42	17.85	46.03	0.144
287	1	1	52	0	22.3	2	2	2	1	1	1	49	3												0.637	-1.02	77	3	221	3	24	14	1	39.7	5.37	75.87	29.06	0.263
288	1	1	50	0	22.3	2	2	2	1	1	1	48	2												0.56	-1.86	76	1	70	1	3	13	1	45.4	4.18	46.39	32.84	0.166
289	1	1	53	0	23.8	2	2	2	1	1	1	50	3												0.363	-4.02	78	1	38	3	23	14	1	43.1	2	57.85	69.7	0.403
290	0	1	54	0	24	3	2	3	1	1	1	50	4												0.431	-3.28	77	0	0	0	0	0	0	46.6	11.25	79.77	83.43	0.32
291	0	1	54	1	24.4	3	2	3	1	1	0														1.042	1.37	73	0	0	0	0	0	0	42.7	28.68	45.44	54.76	0.287
292	1	1	48	0	26.8	2	2	2	2	1	1	46	2												0.307	-4.64	79	3	214	3	20	14	1	46.2	6.68	42.27	35.39	0.284
293	1	1	52	0	21.6	2	2	2	1	1	1	50	2												0.39	-3.73	79	1	6	1	5	14	1	47	8.73	49.21	32.78	0.325
294	0	1	52	1	30.9	3	2	2	1	1	0														0.493	-3.57	82	0	0	0	0	0	0	48.4	21.33	56.84	68.21	0.449
295	1	1	50	0	25.8	2	2	2	1	1	1	46	4												0.344	-4.23	71	1	41	1	6	14	1	43.6	9.78	55.45	67.01	0.281
296	0	1	53	1	23.7	3	2	2	1	1	0														0.69	-1.8	91	0	0	0	0	0	0	42.2	15.34	91.81	51.11	0.468
297	0	1	53	0	24.7	2	2	2	1	1	1	50	3												0.233	-5.45	76	0	0	0	0	0	0	41.1	8.62	53.06	84.06	0.414
298	0	1	50	0	19.1	3	2	3	1	1	1	48	2												0.418	-3.41	74	0	0	0	0	0	0	47.5	7.03	21.8	32.47	0.164
299	1	1	54	0	25.4	3	2	3	1	1	1	52	2												0.281	-4.92	84	1	12	2	9	14	1	47.2	7.82	27.66	96.7	0.408
300	1	1	52	1	24.4	2	2	2	1	1	0														0.61	-2.52	79	2	137	3	24	14	1	41.5	6.18	21.46	77.31	0.352
301	1	1	52	1	23.5	2	2	2	1	1	0														0.879	-0.1	84	1	40	3	23	16	2	43.5	9.44	56.32	38.02	0.248
302	0	1	52	0	32.8	3	1	3	1	1	1	48	4												0.315	-4.55	80	0	0	0	0	0	0	43.2	9.32	79.58	121.6	0.669
303	0	1	50	0	28.2	3	3	3	1	1	1	48	2												0.284	-4.88	74	0	0	0	0	0	0	45.9	26.63	17.57	34.89	0.181
304	0	1	50	0	25	3	2	3	1	1	1	49	1												0.574	-1.71	76	0	0	0	0	0	0	46.6	11.25	79.77	83.43	0.32
305	0	1	55	1	20.2	3	3	2	1	1	0														0.794	-0.87	79	0	0	0	0	0	0	46.7	26.41	26.62	48.16	0.519
306	1	1	50	0	23.9	2	2	2	1	1	1	46	4												0.414	-3.46	76	1	5	1	3	165	3	43	11.52	63.78	37.42	0.123
307	0	1	52	0	23.9	3	2	2	1	1	1	48	4												0.21	-5.7	77	0	0	0	0	0	0	49.4	10.23	36.46	55.89	0.743
308	0	1	50	1	24.3	3	2	1	1	1	0														0.661	-2.06	94	0	0	0	0	0	0	46.1	12.7	44.86	49.93	0.383
309	0	1	50	0	26.4	3	1	3	1	1	1	48	2												0.378	-3.86	78	0	0	0	0	0	0	45	10.51	25.3	111.1	0.248
310	1	1	51	1	23.4	2	2	2	1	1	0														0.54	-3.14	89	1	72	3	24	14	1	43.8	9.79	41.55	42.33	0.141
311	0	1	53	0	26.4	3	1	3	1	1	1	51	2												0.248	-5.28	76	0	0	0	0	0	0	42.2	15.34	91.81	51.11	0.468
312	1	1	56	0	23.6	2	2	2	1	1	1	54	2												0.499	-2.54	75	2	144	3	24	14	1	42.9	8.91	35.4	87.94	0.39
313	0	1	53	0	27.9	3	3	3	1	1	1	51	2												0.656	-0.81	75	0	0	0	0	0	0	43.9	15.5	35.08	43.26	0.282
314	1	1	55	0	24.7	3	1	3	1	1	1	47	8												0.606	-1.36	77	1	38	3	24	14	1	45.1	2	51.6	47.21	0.294
315	1	1	55	1	27.7	3	2	3	1	1	0														0.478	-3.71	77	1	2	1	2	14	1	44.3	20.77	36.95	33.03	0.267
316	0	1	50	1	27.5	3	2	3	1	1	0														0.874	-0.14	77	0	0	0	0	0	0	42.7	28.68	45.44	54.76	0.287
317	1	1	53	0	23.4	3	2	3	1	1	1	52	1												0.433	-3.25	76	3	237	3	24	17	2	41.9	7.76	48.86	49.24	0.147
318	1	1	53	0	20	3	2	3	1	1	1	48	5												0.243	-5.34	75	2	175	1	6	20	2	40.1	9.93	41.07	107.7	0.234
319	1	1	56	0	26.8	2	2	2	1	1	1	53	3												0.537	-2.12	75	1	52	3	24	14	1	45.9	2	37.43	61.07	0.371
320	0	1	51	0	21.4	3	1	2	1	1	1	48	3												0.53	-2.19	79	0	0	0	0	0	0	47.8	6.72	31.26	33.88	0.218
321	0	1	50	1	26.8	3	3	3	1	1	0														0.965	0.67	88	0	0	0	0	0	0	46.7	26.41	26.62	48.16	0.519
322	0	1	51	1	28.7	3	3	3	1	1	0														0.632	-2.32	79	0	0	0	0	0	0	47.9	13.05	47.93	61.87	0.183
323	1	1	53	0	33.3	2	2	2	1	1	1	49	4												0.643	-0.96	77	2	183	3	24	14	1	39.6	9.94	50.45	105.5	0.553
324	0	1	50	0	21.8	3	2	3	1	1	1	48	2												0.541	-2.07	76	0	0	0	0	0	0	43.7	8.89	16.58	63.76	0.479
325	0	1	52	0	22.7	2	2	2	1	1	1	48	4												0.333	-4.35	79	0	0	0	0	0	0	46.6	6.09	26.07	130.6	0.68
326	1	1	57	1	21.5	3	1	2	1	1	0														0.496	-3.54	79	1	41	3	23	14	1	44.2	10.78	77.88	46.2	0.153
327	0	1	50	0	23.4	1	2	1	1	1	1	49	1												0.332	-4.36	83	0	0	0	0	0	0	43.5	8.63	50.33	40.13	0.495
328	1	1	56	0	20.2	2	2	2	1	1	1	47	9												0.216	-6.06	76	1	34	3	19	28	2	41.7	7.75	45.38	45.19	0.309
329	1	1	56	1	26.6	2	2	2	1	1	0														0.616	-2.47	78	1	38	2	11	14	1	43.5	18.84	48.34	62.96	0.34
330	0	1	51	0	31.7	3	2	3	1	1	1	50	1												0.782	0.57	79	0	0	0	0	0	0	44.4	9.99	22	44.18	0.2
331	1	1	50	1	24.1	2	2	2	1	1	0														0.779	-1	78	2	195	3	24	14	1	44.3	6.31	61.86	33.2	0.333
332	0	1	52	0	28.2	3	2	3	1	1	1	50	2												0.272	-5.02	81	0	0	0	0	0	0	45.9	14.96	58.97	33.5	0.254
333	1	1	53	1	25.4	2	2	2	1	1	0														0.57	-2.88	75	1	93	2	10	14	1	43.7	11.18	32.56	32.14	0.26
334	1	1	56	1	30.9	2	2	2	1	1	0														1.304	3.72	95	1	2	1	2	16	2	47.9	12.27	57.16	28.22	0.114
335	0	1	52	1	21.7	3	3	3	1	1	0														0.554	-3.02	74	0	0	0	0	0	0	45.7	19.22	25.08	46.4	0.303
336	1	1	50	1	29.8	2	2	2	1	1	0														0.875	-0.13	78	1	30	1	3	16	2	43.4	7.19	68.65	29.12	0.255
337	1	1	51	0	31.2	3	2	2	1	1	1	48	3												0.406	-3.55	77	1	73	3	23	14	1	40.6	7.09	32.71	85.34	0.225
338	0	1	53	0	30.9	3	2	3	1	1	1	52	1												0.329	-4.39	75	0	0	0	0	0	0	45	12.09	22.59	47.23	0.145
339	1	1	56	0	24	2	2	2	1	1	1	49	7												0.042	-7.54	76	1	27	2	16	28	2	44.1	14.64	41.18	115.7	0.291
340	0	1	55	0	27.1	3	2	2	1	1	1	49	6												0.323	-4.46	76	0	0	0	0	0	0	43.2	11.42	17.85	46.03	0.144
341	0	1	52	0	26.4	3	2	2	1	1	1	48	4												0.489	-2.64	79	0	0	0	0	0	0	43.3	10	49.99	98.81	0.962
342	1	1	51	1	30.4	2	2	2	1	1	0														0.632	-2.32	79	2	173	3	24	14	1	40.8	7.4	32.7	33.05	0.118
343	0	1	50	0	20	3	2	3	1	1	1	48	2												0.278	-4.95	76	0	0	0	0	0	0	44.7	5	79	84.91	0.355
344	1	1	50	0	27.5	2	2	2	1	1	1	47	3												0.444	-3.13	82	2	102	1	3	29	3	43.7	2	27.78	44.9	0.13
345	0	1	54	1	26	3	3	3	1	1	0														0.811	-0.71	77	0	0	0	0	0	0	42.8	20.37	35.32	50.88	0.073
346	0	1	53	0	27.1	3	1	3	1	1	1	49	4												0.771	0.45	77	0	0	0	0	0	0	45.7	11.26	21.66	59.49	0.338
347	0	1	55	0	29.1	3	2	3	1	1	1	35	20												0.334	-4.34	74	0	0	0	0	0	0	41.4	7.67	20.69	68.64	0.191
348	0	1	54	0	24.7	3	2	3	1	1	1	50	4												0.288	-4.84	77	0	0	0	0	0	0	46	14.78	43.96	65.27	0.425
349	1	1	54	1	26.1	2	2	2	1	1	0														1.4	0.721	76	1	5	1	5	14	1	44.8	13.1	31.13	31.31	0.527
350	0	1	55	1	19.5	2	2	3	1	1	0														0.799	-0.81	80	0	0	0	0	0	0	42.9	18.5	44.66	103.1	0.497
351	0	1	51	0	25.2	3	2	3	1	1	1	49	2												0.285	-4.88	78	0	0	0	0	0	0	43.2	11.42	17.85	46.03	0.144
352	0	1	50	0	29.3	2	2	1	1	1	1	50	0												0.49	-2.63	74	0	0	0	0	0	0	49.2	15.36	33.6	66.2	0.143
353	0	1	53	0	24.6	3	2	3	1	1	1	46	7												0.309	-4.61	80	0	0	0	0	0	0	45.3	7.63	36.31	95.53	0.395
354	0	1	52	1	30.4	3	3	3	1	1	0														0.745	-1.3	83	0	0	0	0	0	0	43.9	19.34	37.11	11.56	0.183
355	0	1	55	0	24	3	2	3	1	1	1	50	5												0.671	-0.65	74	0	0	0	0	0	0	45.5	15.95	16.31	46.63	0.112
356	0	1	52	0	31.1	3	2	3	1	1	1	49	3												0.376	-3.88	74	0	0	0	0	0	0	50.1	12.14	35.7	40.26	0.471
357	1	1	53	1	29.3	3	3	3	1	1	0														0.994	0.93	76	1	56	3	20	15	2	41.3	9.53	37.21	44.99	0.219
358	0	1	54	0	26.6	3	2	3	1	1	1	49	5												0.272	-5.02	78	0	0	0	0	0	0	43.5	8.63	50.33	40.13	0.495
359	1	1	52	0	23.4	2	2	2	1	1	1	51	1												0.366	-3.99	75	1	11	1	3	26	2	44.1	4.64	30.31	104.7	0.594
360	0	1	50	0	26.7	3	2	3	1	1	1	48	2												0.532	-2.18	77	0	0	0	0	0	0	43.5	9.57	32.48	49.4	0.198
361	0	1	51	0	23.9	3	2	3	1	1	1	45	6												0.678	-0.57	76	0	0	0	0	0	0	46.3	22.84	88.87	64.71	0.31
362	0	1	52	0	30	3	2	3	1	1	1	48	4												0.392	-3.71	78	0	0	0	0	0	0	47.9	13.44	34.8	84.13	0.851
363	0	1	53	0	32.5	3	2	2	1	1	1	50	3												0.57	-1.76	76	0	0	0	0	0	0	44.2	20.75	38.15	72.69	0.397
364	0	1	54	1	25	3	2	3	1	1	0														0.746	-1.29	74	0	0	0	0	0	0	45	12.09	22.59	47.23	0.145
365	0	1	53	0	26.2	3	1	3	1	1	1	49	4												0.289	-4.83	75	0	0	0	0	0	0	43.5	8.63	50.33	40.13	0.495
366	0	1	50	0	23.8	2	3	1	1	1	1	42	8												0.354	-4.13	79	0	0	0	0	0	0	45.6	13.95	36.06	38.66	0.15
367	0	1	51	1	19.1	3	2	2	1	1	0														0.397	-4.43	76	0	0	0	0	0	0	46.7	26.41	26.62	48.16	0.519
368	1	1	57	1	27.6	3	2	3	1	1	0														0.777	-1.02	76	2	187	3	24	14	1	40.3	12.37	47.43	35.02	0.18
369	1	1	55	1	26.2	2	2	2	1	1	0														0.622	-2.41	81	1	3	1	3	14	1	42.4	14.76	52.88	36.81	0.119
370	1	1	55	1	24.8	2	2	2	1	1	0														0.759	-1.18	79	1	21	3	20	17	2	42.1	12.03	64.54	21.21	0.16
371	1	1	53	0	30	2	2	2	1	1	1	52	1												0.585	-1.59	77	1	51	2	12	17	2	42.8	8.51	37.19	79.3	0.565
372	0	1	50	0	24.8	3	1	2	1	1	1	45	5												0.642	-0.96	80	0	0	0	0	0	0	46.4	9.34	37.33	84.86	0.834
373	0	1	53	1	27.3	3	2	3	1	1	0														0.717	-1.56	77	0	0	0	0	0	0	46.5	28.46	19.12	37.65	0.099
374	0	1	52	0	23.4	3	2	3	1	1	1	51	1												0.603	-1.39	77	0	0	0	0	0	0	43.9	19.34	37.11	11.56	0.183
375	0	1	50	0	24	2	2	2	1	1	1	48	2												0.533	-2.16	75	0	0	0	0	0	0	45.5	23.18	33.59	71.92	0.224
376	1	1	56	0	20.2	2	2	2	1	1	1	40	16												0.403	-3.58	76	1	64	3	24	14	1	40.5	2	59.4	44.13	0.221
377	0	1	50	0	24.8	3	2	1	1	1	1	44	6												0.535	-2.14	80	0	0	0	0	0	0	45.1	7.4	89.73	49.39	0.436
378	1	1	53	0	30.4	2	2	2	1	1	1	50	3												0.387	-3.76	78	1	27	3	21	14	1	44.8	8.48	81.79	50.44	0.244
379	1	1	50	1	21.8	2	2	2	1	1	0														0.71	-1.62	76	1	38	1	8	14	1	43	11.19	59.55	27.77	0.163
380	1	1	50	1	27.4	2	2	2	1	1	0														1.095	1.84	75	1	46	3	23	14	1	45.8	11.69	41	33.45	0.221
381	0	1	54	1	23	3	3	3	1	1	0														0.626	-2.37	73	0	0	0	0	0	0	48	13.43	28.77	71.03	0.13
382	0	1	53	0	24.6	3	2	2	1	1	1	47	6												0.155	-6.3	78	0	0	0	0	0	0	49.1	10.71	25.43	132.9	0.477
383	0	1	55	0	24.5	3	2	3	1	1	1	51	4												0.5	-2.52	77	0	0	0	0	0	0	41.9	19.79	41.05	56.06	0.353
384	0	1	54	0	25	3	2	3	1	1	1	53	1												0.336	-4.32	78	0	0	0	0	0	0	45.1	13.29	48.18	50.03	0.321
385	1	1	55	1	27.6	2	2	2	1	1	0														0.546	-3.1	84	1	98	3	24	14	1	41.9	5.72	54.85	54.63	0.249
386	0	1	50	0	28	3	2	3	1	1	1	48	2												0.469	-2.86	73	0	0	0	0	0	0	41.5	12.65	52.93	88.38	0.503
387	0	1	54	1	26.6	3	3	3	1	1	0														0.536	-3.18	78	0	0	0	0	0	0	47.3	19.96	30.02	48.88	0.237
388	0	1	57	1	24.6	3	2	3	1	1	0														0.44	-4.04	79	0	0	0	0	0	0	42.7	28.68	45.44	54.76	0.287
389	0	1	53	0	23.4	3	1	2	1	1	1	52	1												0.86	1.42	76	0	0	0	0	0	0	47.7	25.39	17.81	70.89	0.466
390	0	1	50	0	26.2	3	2	3	1	1	1	49	1												0.475	-2.79	80	0	0	0	0	0	0	45.6	17.42	27.85	100.2	1.2
391	0	1	53	1	25.4	3	2	3	1	1	0														0.526	-3.28	76	0	0	0	0	0	0	47.3	9	38.94	46.69	0.243
392	0	1	50	0	25.3	1	2	1	1	1	1	46	4												0.61	-1.31	79	0	0	0	0	0	0	48.1	7.81	24.69	50.25	0.175
393	1	1	57	0	24.1	2	2	2	1	1	1	50	7												0.343	-4.24	77	1	59	3	24	14	1	42.3	7.04	51.64	51.86	0.195
394	0	1	51	1	21.9	3	2	3	1	1	0														1.365	4.27	78	0	0	0	0	0	0	49.8	21.17	36.28	75.04	0.582
395	1	1	53	1	24.2	2	2	2	1	1	0														0.885	-0.05	74	2	197	3	24	14	1	43.6	9.78	42.77	67.53	0.197
396	1	1	53	1	32.4	2	2	2	1	1	0														0.698	-1.18	77	1	54	3	24	14	1	45.9	10.44	37.58	32.56	0.117
397	0	1	52	1	20.6	3	2	1	1	1	0														0.859	-0.28	82	0	0	0	0	0	0	47.7	25.39	17.81	70.89	0.466
398	0	1	54	0	70.2	2	2	1	1	1	1	49	5												0.311	-4.6	82	0	0	0	0	0	0	44.4	18.49	30.42	52.9	0.224
399	1	1	50	0	23.4	2	2	2	1	1	1	48	2												0.73	0	80	1	38	3	24	14	1	43.3	6.95	37.69	39.96	0.17
400	1	1	55	0	24.3	3	2	2	1	1	1	52	3												0.731	0.01	81	1	64	3	18	18	2	42.8	4.43	83.3	95.74	0.164
401	0	1	53	1	26.7	3	2	3	1	1	0														0.815	-0.68	80	0	0	0	0	0	0	48.4	14.44	45.29	86.34	0.247
402	0	1	55	0	20.5	3	2	2	1	1	1	51	4												0.498	-2.55	79	0	0	0	0	0	0	47.7	7.22	46.81	68.32	0.334
403	0	1	50	0	20.8	3	2	3	1	1	1	48	2												0.385	-3.78	79	0	0	0	0	0	0	46.4	15.56	39.91	93.45	0.636
404	1	1	54	1	27.1	2	2	2	1	1	0														0.575	-2.84	72	1	31	2	12	14	1	42.5	22.07	36.94	52.06	0.269
405	0	1	51	1	28.3	3	3	3	1	1	0														0.694	-1.76	75	0	0	0	0	0	0	48	13.43	28.77	71.03	0.13
406	1	1	54	1	28.6	2	2	2	1	1	0														0.68	-1.89	75	1	45	3	23	14	1	44.1	12.21	43.19	32.9	0.259
407	0	1	52	0	25.2	2	2	1	1	1	1	51	1												0.433	-3.25	78	0	0	0	0	0	0	46.2	10.21	26.32	33.33	0.165
408	1	1	51	1	26.6	2	2	2	1	1	0														0.687	-1.82	77	1	34	1	6	16	2	45	22.77	26.04	63.85	0.338
409	1	1	52	0	26	2	2	2	1	1	1	50	2												0.387	-3.76	76	2	104	3	24	14	1	47.5	5.22	29.78	46.91	0.302
410	1	1	52	0	23.1	3	2	3	1	1	1	49	3												0.378	-3.85	74	2	119	1	3	143	3	40.6	6.04	55.21	105.2	0.397
411	1	1	55	0	32.9	2	2	2	1	1	1	51	4												0.412	-3.49	77	1	99	3	23	14	1	42.8	5.75	27.61	77.09	0.399
412	0	1	52	0	22.2	2	2	1	1	1	1	47	5												0.388	-3.75	79	0	0	0	0	0	0	45.1	10.16	55.38	76.75	0.403
413	1	1	56	1	28.2	3	3	3	1	1	0														0.739	-1.36	77	1	47	3	21	15	2	41.6	7.19	45.5	42.36	0.275
414	0	1	55	1	25.7	3	2	3	1	1	0														0.653	-2.13	78	0	0	0	0	0	0	45.5	15.95	16.31	46.63	0.112
415	0	1	54	0	29.1	3	2	3	1	1	1	52	2												0.473	-2.81	78	0	0	0	0	0	0	42.8	20.37	35.32	50.88	0.073
416	0	1	50	0	26.3	3	2	3	1	1	1	48	2												0.463	-2.93	78	0	0	0	0	0	0	45.1	14.72	50.25	43.49	0.317
417	1	1	52	1	30.5	3	1	3	1	1	0														0.775	-1.03	79	2	144	3	24	23	2	43.6	9.06	32.7	37.46	0.325
418	0	1	50	0	24	3	2	2	1	1	1	44	6												0.649	-0.89	80	0	0	0	0	0	0	47.5	2	45.34	44.47	0.468
419	0	1	50	0	24	2	2	1	1	1	1	48	2												0.37	-3.95	79	0	0	0	0	0	0	46.7	5.8	28.64	56.59	0.675
420	0	1	55	1	23.6	3	1	3	1	1	0														0.923	0.3	77	0	0	0	0	0	0	43.1	11.24	16.26	18.78	0.024
421	1	1	50	0	22.7	2	2	3	1	1	1	45	5												0.465	-2.9	78	1	54	1	4	19	2	41.7	7.88	60.98	44.49	0.299
422	1	1	55	1	32.7	2	2	2	1	1	0														0.939	0.44	76	3	249	3	24	14	1	43.5	7.9	75.4	69.79	0.336
423	0	1	50	1	23	3	2	3	1	1	0														0.702	-1.69	77	0	0	0	0	0	0	41.9	19.79	41.05	56.06	0.353
424	1	1	52	1	20.9	3	2	3	1	1	0														0.852	-0.35	72	1	53	3	24	14	1	42.3	6.44	34.35	72.22	0.434
425	1	1	56	0	22.9	2	2	2	1	1	1	52	4												0.438	-3.2	77	3	211	3	24	14	1	43.6	5.35	36.65	61.26	0.355
426	0	1	51	0	24	3	2	3	1	1	1	49	2												0.402	-3.6	79	0	0	0	0	0	0	40.4	7.94	50.25	29.27	0.043
427	1	1	56	1	29.7	2	2	2	1	1	0														0.729	-1.44	78	1	61	3	23	14	1	44	11.87	66.02	39.97	0.23
428	1	1	50	1	22.9	2	2	2	1	1	0														0.297	-5.33	72	2	135	3	24	14	1	42.1	6.9	54.75	49.34	0.227
429	1	1	54	1	21.8	2	2	2	1	1	0														0.584	-2.75	86	1	31	1	7	28	2	41.1	9.59	40.73	65.05	0.561
430	1	1	51	1	24.2	2	2	2	1	1	0														0.573	-2.85	76	1	38	2	10	17	2	43	14.49	38.11	34.38	0.453
431	0	1	50	1	28.3	3	2	2	1	1	0														0.965	0.67	86	0	0	0	0	0	0	42.7	28.68	45.44	54.76	0.287
432	0	1	54	0	27.1	3	2	3	1	1	1	50	4												0.585	-1.59	74	0	0	0	0	0	0	42	10.87	78.22	65.66	0.452
433	1	1	55	1	23.6	3	2	3	1	1	0														0.767	-1.1	82	2	149	3	18	15	2	39.4	10.18	31.65	44.73	0.257
434	0	1	52	0	30	3	1	3	1	1	1	48	4												0.626	-1.14	78	0	0	0	0	0	0	44	4.92	56.95	33.14	0.089
435	1	1	55	1	22.1	2	2	2	1	1	0														0.57	-2.87	89	1	56	3	18	15	2	46.7	12.92	36.62	29.97	0.129
436	0	1	55	1	30.1	3	3	3	1	1	0														0.557	-2.99	79	0	0	0	0	0	0	44.9	13.43	30.31	66.97	0.25
437	1	1	57	0	25.4	3	1	2	1	1	1	52	5												0.379	-3.84	75	2	196	3	24	14	1	42.7	6.19	25.61	89.92	0.37
438	0	1	52	1	26.5	3	3	3	1	1	0														0.969	0.71	73	0	0	0	0	0	0	42.1	11.2	49.24	39.36	0.317
439	0	1	54	0	26.2	2	2	1	1	1	1	49	5												0.204	-5.77	75	0	0	0	0	0	0	44.9	7.62	56.44	70.92	0.534
440	1	1	50	1	30.4	2	2	2	1	1	0														0.877	-0.12	75	2	130	3	19	20	2	43	17.69	45.58	82.16	0.422
441	1	1	56	0	28	3	3	2	1	1	1	51	5												0.377	-3.87	80	2	172	1	8	18	2	40	7.62	25.02	75.95	0.388
442	0	1	50	0	19.23	3	2	3	1	1	1	49	1												0.215	-5.65	76	0	0	0	0	0	0	45.4	8.95	35.54	72.72	0.703
443	1	1	55	1	27.3	2	2	2	1	1	0														1.05	1.44	77	2	161	3	24	14	1	44.1	7.21	33.47	62.04	0.23
444	1	1	58	1	27.7	2	2	2	1	1	0														0.887	-0.02	75	2	176	3	24	14	1	41.8	9.78	40.8	36.98	0.168
445	0	1	53	1	22	3	2	3	1	1	0														0.828	-0.55	77	0	0	0	0	0	0	45	12.09	22.59	47.23	0.145
446	0	1	50	0	24.1	3	2	2	1	1	1	48	2												0.318	-4.51	77	0	0	0	0	0	0	45.5	5.91	61.18	75.34	0.811
447	0	1	57	0	22.2	3	2	1	1	1	1	47	10												0.423	-3.37	78	0	0	0	0	0	0	48.6	11.01	58.46	53.65	0.541
448	0	1	50	1	19	3	3	3	1	1	0														0.617	-2.46	76	0	0	0	0	0	0	42.2	15.34	91.81	51.11	0.468
449	0	1	52	1	23.8	3	2	3	1	1	0														0.461	-3.85	78	0	0	0	0	0	0	43.6	20.17	41.4	66.3	0.515
450	0	1	52	1	26.8	3	2	1	1	1	0														0.867	-0.21	84	0	0	0	0	0	0	46.7	26.41	26.62	48.16	0.519
451	0	1	54	1	26.1	3	2	3	1	1	0														1.082	1.72	77	0	0	0	0	0	0	48.4	21.33	56.84	68.21	0.449
452	1	1	56	0	28.9	2	2	2	1	1	1	55	1												0.44	-3.17	73	3	221	3	24	14	1	44.1	7.4	24.08	54.57	0.126
453	0	1	50	1	23.3	3	2	1	1	1	0														0.738	-1.37	79	0	0	0	0	0	0	42.8	20.37	35.32	50.88	0.073
454	1	1	52	1	22.7	3	2	3	1	1	0														0.685	-1.84	75	1	19	3	17	14	1	44.9	13.45	48.29	58.76	0.27
455	1	1	58	0	21.4	2	2	2	1	1	1	49	9												0.135	-6.52	83	1	94	3	21	14	1	39	2	64.98	148.6	0.685
456	0	1	50	0	21.9	3	2	3	1	1	1	48	2												0.493	-2.6	80	0	0	0	0	0	0	45.6	14.47	18.03	74.75	0.32
457	0	1	54	1	25.1	3	3	3	1	1	0														0.713	-1.59	78	0	0	0	0	0	0	43.9	15.5	35.08	43.26	0.282
458	1	1	53	0	25.4	2	2	2	1	1	1	50	3												0.261	-5.14	77	1	74	3	23	14	1	42.9	2	94.44	89.11	0.383
459	0	1	50	0	22.6	3	1	3	1	1	1	50	0												0.311	-4.59	81	0	0	0	0	0	0	48.7	23.95	81.05	59.83	0.34
460	1	1	52	1	31.6	3	2	3	1	1	0														0.713	-1.59	74	1	56	2	13	18	2	44.7	13.69	54.5	48.05	0.374
461	0	1	52	0	41.1	3	1	3	1	1	1	50	2												0.798	0.74	76	0	0	0	0	0	0	43.2	10.58	78.36	63.86	0.285
462	0	1	54	1	24.8	3	3	3	1	1	0														0.845	-0.4	73	0	0	0	0	0	0	45.1	13.29	48.18	50.03	0.321
463	0	1	52	0	24	3	2	3	1	1	1	51	1												0.358	-4.07	77	0	0	0	0	0	0	47.4	9.8	50.29	36.46	0.041
464	0	1	51	1	27.7	3	2	3	1	1	0														0.796	-0.85	78	0	0	0	0	0	0	42.7	28.68	45.44	54.76	0.287
465	1	1	50	0	31.2	2	2	2	1	1	1	48	2												0.441	-3.17	74	2	123	3	23	14	1	41.1	5.14	47.6	69.15	0.231
466	0	1	54	0	30	3	3	3	1	1	1	44	10												0.595	-1.48	80	0	0	0	0	0	0	45.7	6.63	60.76	43.53	0.297
467	0	1	50	0	28	3	2	3	1	1	1	36	14												0.455	-3.01	77	0	0	0	0	0	0	43.5	7.47	26	86.82	0.481
468	0	1	55	1	23.4	3	2	3	1	1	0														0.617	-2.45	77	0	0	0	0	0	0	46.9	36.68	24.45	56.56	0.383
469	1	1	56	0	31.6	2	2	2	1	1	1	49	7												0.442	-3.15	77	1	85	3	19	14	1	42.1	6.67	38.77	64.25	0.229
470	1	1	51	1	25.7	3	2	3	1	1	0														0.789	-0.91	74	1	27	1	3	14	1	41.8	11.95	29.75	35.22	0.31
471	0	1	52	0	25.5	3	2	3	1	1	1	50	2												0.568	-1.77	73	0	0	0	0	0	0	49.4	7.97	36.8	43.42	0.188
472	0	1	51	0	23.1	3	2	2	1	1	1	49	2												0.183	-6	70	0	0	0	0	0	0	48.5	16.63	33.88	78.53	0.841
473	0	1	50	1	27.1	3	2	1	1	1	0														0.568	-2.9	83	0	0	0	0	0	0	46.7	17.4	59.97	72.92	0.595
474	0	1	51	0	25.8	3	2	2	1	1	1	48	3												0.794	0.7	76	0	0	0	0	0	0	44.5	6.93	27.72	45.79	0.205
475	0	1	54	0	23.4	3	1	3	1	1	1	53	1												-0.513	-2.38	78	0	0	0	0	0	0	42.5	15.25	16.87	83.03	0.228
476	0	1	51	0	33.3	3	3	3	1	1	1	49	2												0.269	-5.05	80	0	0	0	0	0	0	45.2	12.92	39.14	52.11	0.266
477	0	1	50	0	25	3	2	3	1	1	1	48	2												0.453	-3.04	77	0	0	0	0	0	0	44.8	8.77	36.42	33.64	0.121
478	1	1	50	0	26	2	2	2	1	1	1	48	2												0.284	-4.89	77	1	82	3	24	14	1	42.1	4.39	86.88	43.25	0.329
479	1	1	50	1	33.2	2	2	2	1	1	0														0.867	-0.21	75	1	67	1	8	14	1	43.3	11.91	89.98	90.34	0.42
480	1	1	57	0	28.8	2	2	2	1	1	1	48	9												0.537	-2.12	74	2	165	3	24	14	1	42.1	7.05	36.04	81.06	0.503
481	1	1	58	1	27.6	2	2	2	1	1	0														0.883	-0.06	84	2	167	3	22	15	2	42.9	6.45	86.09	47.28	0.191
482	1	1	54	0	21.2	2	2	2	1	1	1	50	4												0.317	-4.52	75	1	29	1	3	14	1	40.3	17.4	49.72	89.07	0.444
483	0	1	54	1	28.4	2	2	3	1	1	0														0.933	0.38	76	0	0	0	0	0	0	43.2	12.39	39.44	64.09	0.76
484	0	1	50	1	25.5	2	2	3	1	1	0														0.565	-2.92	79	0	0	0	0	0	0	46.5	15.96	41.5	56.64	0.34
485	0	1	54	0	24.4	3	1	3	1	1	1	50	4												0.439	-3.19	79	0	0	0	0	0	0	44.2	9.98	85.85	28.06	0.112
486	1	1	58	0	22.9	2	2	2	1	1	1	53	5												0.531	-2.18	74	1	71	1	3	136	3	43.2	10.24	66.28	70.52	0.252
487	0	1	53	1	27.1	3	3	3	1	1	0														0.649	-2.17	77	0	0	0	0	0	0	47	11.79	41.28	52.66	0.315
488	1	1	50	0	25.4	2	2	2	1	1	1	45	5												0.492	-2.6	76	1	90	3	21	28	2	44	5.05	30.53	24.77	0.091
489	1	1	56	0	21.5	2	2	2	1	1	1	48	8												0.31	-4.61	76	1	16	2	16	14	1	45.9	9.76	40.82	74.4	0.336
490	1	1	26	1	21.5	2	2	3	1	1	0														0.876	-0.13	78	1	30	3	24	14	1	43.6	5.71	51.4	37.14	0.219
491	1	1	53	1	22.7	2	2	2	1	1	0														0.665	-2.03	75	1	57	3	24	14	1	48.4	9.02	47.84	19.12	0.099
492	0	1	53	0	23.8	1	1	1	1	1	1	49	4												0.312	-4.58	74	0	0	0	0	0	0	42.6	10.04	39.99	66.71	0.428
493	0	1	50	1	26	3	2	2	1	1	0														0.735	-1.39	77	0	0	0	0	0	0	46.2	23.92	27.26	84.85	0.524
494	0	1	51	0	24.6	3	2	1	1	1	1	48	3												0.165	-6.19	81	0	0	0	0	0	0	45.1	16.83	40.35	58.78	0.221
495	0	1	55	0	22.3	3	2	3	1	1	1	52	3												0.451	-3.06	77	0	0	0	0	0	0	43.2	10.47	34.94	62.56	0.242
496	1	1	56	0	23.3	2	2	2	1	1	1	51	5												0.367	-3.98	75	1	22	2	15	15	2	42.1	6.67	61.83	65.19	0.692
497	0	1	51	1	26.4	3	1	3	1	1	0														0.639	-2.26	76	0	0	0	0	0	0	44.7	19.44	56.38	68.64	0.415
498	0	1	50	0	23.4	3	1	3	1	1	1	48	2												0.45	-3.07	76	0	0	0	0	0	0	44.7	11.9	46.95	31.63	0.23
499	0	1	53	0	28	3	2	3	1	1	1	51	2												0.399	-3.62	75	0	0	0	0	0	0	43.6	9.23	35.38	54.96	0.487
500	0	1	50	1	23.4	3	3	3	1	1	0														0.511	-3.41	76	0	0	0	0	0	0	43.8	23.83	38.32	67.76	0.16
501	0	1	52	0	56.9	3	1	3	1	1	1	51	1												0.293	-4.79	78	0	0	0	0	0	0	44.2	13.83	21.75	58.86	0.244
502	1	1	55	0	23.1	2	2	2	1	1	1	47	8												0.475	-2.8	77	1	52	3	24	14	1	44.6	6.75	30.63	15.29	0.144
503	0	1	52	1	28.7	3	2	3	1	1	0														0.895	0.05	79	0	0	0	0	0	0	43.3	28.13	53.38	44.07	0.279
504	0	1	55	1	27.3	3	3	3	1	1	0														0.639	-2.25	76	0	0	0	0	0	0	39.3	17.17	65.13	51.62	0.132
505	1	1	53	0	29.3	2	2	2	1	1	1	51	2												0.308	-4.62	75	1	30	3	21	16	2	46.5	2	37.93	55.11	0.256
506	0	1	53	0	21.9	2	2	1	1	1	1	50	3												0.298	-4.73	80	0	0	0	0	0	0	45.3	9.13	56.64	85.19	0.647
507	1	1	56	0	25.4	2	2	2	1	1	1	54	2												0.263	-5.63	79	1	55	3	17	17	2	41.5	7.11	65.95	89.94	0.275
508	0	1	51	0	29.6	3	2	3	1	1	1	49	2												0.37	-3.95	75	0	0	0	0	0	0	49.8	10.4	59.68	61.21	0.333
509	1	1	54	0	26.7	3	1	3	1	1	1	52	2												0.478	-3.71	77	1	46	3	24	14	1	44.2	7.88	53.79	43.75	0.464
510	0	1	50	1	23.4	3	3	3	1	1	0														0.699	-1.71	73	0	0	0	0	0	0	45.1	11.62	71.27	91.47	0.293
511	0	1	55	1	24.2	3	2	3	1	1	0														1.236	3.11	75	0	0	0	0	0	0	46.6	27.36	37.5	37.55	0.435
512	0	1	52	0	64.9	3	1	3	1	1	1	51	1												0.74	0.11	72	0	0	0	0	0	0	45.8	8.17	24.79	71.26	0.853
513	0	1	50	1	31.6	2	2	1	1	1	0														1.055	1.48	78	0	0	0	0	0	0	47.5	13.63	37.95	41.26	0.18
514	1	1	56	0	27.9	2	2	2	1	1	1	50	6												0.516	-2.34	84	1	58	3	23	14	1	44.2	7.34	21.83	54.25	0.28
515	1	1	58	1	26.2	2	2	3	1	1	0														0.513	-3.39	82	2	188	3	22	14	1	45.5	8.7	42.81	48.75	0.221
516	1	1	50	1	25.7	2	2	2	1	1	0														0.721	-1.52	75	1	12	2	12	14	1	42.2	25.63	41.92	45.35	0.219
517	0	1	50	0	24.6	3	2	3	1	1	1	48	2												0.349	-4.18	85	0	0	0	0	0	0	45.5	8.44	52.39	32.38	0.289
518	0	1	53	0	26.4	3	2	3	1	1	1	50	3												0.349	-4.18	79	0	0	0	0	0	0	38.6	9.25	70.9	55.36	0.202
519	1	1	53	0	21.2	2	2	2	1	1	1	47	6												0.54	-2.09	81	1	5	1	3	13	1	44.8	13.59	30.85	30.32	0.158
520	0	1	55	0	29.3	2	2	2	1	1	1	49	6												0.546	-2.02	75	0	0	0	0	0	0	44.8	17.21	46.11	67.43	0.423
521	0	1	53	0	23.1	2	2	2	1	1	1	50	3												0.294	-4.78	76	0	0	0	0	0	0	40.5	19.13	42.67	119.2	0.767
522	1	1	53	1	25.9	2	2	2	1	1	0														0.868	-0.2	75	1	11	2	11	14	1	43.8	16.7	44.84	60.21	0.327
523	0	1	53	1	29.7	3	3	3	1	1	0														0.678	-1.91	76	0	0	0	0	0	0	44.9	18.01	33.53	31.74	0.128
524	1	1	54	1	23.4	2	2	2	1	1	0														0.476	-3.72	77	1	14	2	14	14	1	42.8	13.08	37.09	70.87	0.299
525	1	1	50	0	27.6	3	2	3	1	1	1	49	1												0.431	-3.28	80	1	16	2	16	14	1	41.9	5.94	33.03	59.38	0.168
526	0	1	53	1	26.9	3	2	3	1	1	0														1.054	1.47	74	0	0	0	0	0	0	46.3	16.05	43.28	40.85	0.257
527	0	1	54	0	23.3	3	1	2	1	1	1	52	2												0.209	-5.71	76	0	0	0	0	0	0	43.4	12.2	42.17	98.16	0.779
528	1	1	57	1	28.3	2	2	2	1	1	0														0.382	-4.56	76	2	134	3	24	14	1	45.9	16.79	34.16	73.25	0.256
529	1	1	50	0	22	2	2	2	1	1	1	50	0												0.298	-4.73	76	1	94	3	24	16	2	45	2	57.92	44.18	0.229
530	0	1	57	0	25.2	3	2	3	1	1	1	47	10												0.461	-2.95	77	0	0	0	0	0	0	46.3	11.78	21.86	60.27	0.579
531	0	1	53	0	29	3	2	3	1	1	1	50	3												0.389	-3.74	73	0	0	0	0	0	0	43.4	11.55	42.51	72.23	0.092
532	1	1	54	1	24.2	2	2	2	1	1	0														0.909	0.17	75	2	181	3	24	14	1	42.5	9.52	72.13	95.92	0.371
533	0	1	50	0	19.6	3	1	2	1	1	1	47	3												0.441	-3.17	75	0	0	0	0	0	0	44.6	8.79	51.28	54.59	0.376
534	1	1	52	0	20.8	2	2	2	1	1	1	46	6												0.43	-3.29	80	2	108	3	21	16	2	41.6	5.5	53.63	90.7	0.327
535	0	1	53	0	22.2	3	2	3	1	1	1	52	1												0.502	-2.5	76	0	0	0	0	0	0	38.6	8.04	49.03	38.76	0.207
536	1	1	55	1	27	2	2	2	1	1	0														0.8	-0.81	73	1	75	3	20	20	2	44.1	5.16	53.89	32.02	0.169
537	0	1	54	1	24.8	3	3	3	1	1	0														0.746	-1.29	77	0	0	0	0	0	0	42.4	15.56	26	44.57	0.211
538	0	1	50	0	26.2	3	1	2	1	1	1	48	2												0.608	-1.34	75	0	0	0	0	0	0	46.2	8.15	47.58	42.26	0.192
539	1	1	52	1	20.2	2	2	2	1	1	0														0.526	-3.27	76	1	50	3	21	14	1	41.6	9.15	48.32	66.5	0.382
540	1	1	57	1	23.7	3	1	3	1	1	0														0.457	-3.89	75	1	54	3	20	14	1	46.7	5.3	30.11	61.05	0.272
541	0	1	51	1	27.1	3	3	3	1	1	0														1.059	1.52	76	0	0	0	0	0	0	43.5	18.51	33.01	54.42	0.262
542	1	1	55	0	19.8	2	2	2	1	1	1	52	3												0.226	-5.52	78	2	132	3	21	14	1	40.9	4.98	40.49	81.72	0.382
543	1	1	57	1	25	3	1	3	1	1	0														0.607	-2.54	79	2	106	2	16	14	1	41.2	9.34	50.12	64.19	0.177
544	1	1	54	0	25.3	2	2	2	1	1	1	53	1												0.491	-2.61	74	2	123	3	23	14	1	44.6	7.61	68.04	75.21	0.238
545	0	1	52	1	29.5	3	2	3	1	1	0														0.449	-3.97	77	0	0	0	0	0	0	43.2	22.97	36.6	54.9	0.115
546	1	1	50	1	20.7	2	2	2	1	1	0														0.517	-3.36	76	1	34	3	18	30	3	40.8	6.95	39.77	82.9	0.445
547	1	1	54	1	20.9	2	2	2	1	1	0														0.565	-2.92	80	1	32	3	17	23	2	41.5	11.63	41.1	53.74	0.187
548	0	1	51	0	26.9	3	2	3	1	1	1	49	2												0.633	-1.07	77	0	0	0	0	0	0	46.8	7.63	35.68	57.9	0.232
549	0	1	54	0	22.7	3	1	1	1	1	1	46	8												0.209	-5.71	76	0	0	0	0	0	0	46.5	12.08	46.76	88.52	0.716
550	1	1	56	1	25.2	2	2	2	1	1	0														0.944	0.49	78	1	65	3	24	15	2	44.5	9.27	73.82	48.65	0.215
551	0	1	54	0	25.3	2	2	2	1	1	1	50	4												0.356	-4.1	78	0	0	0	0	0	0	44.3	10.78	46.67	70.78	0.266
552	0	1	54	0	24	3	2	2	1	1	1	50	4												0.354	-4.13	73	0	0	0	0	0	0	45.5	9.98	31.64	89.81	0.299
553	1	1	57	1	24.6	3	1	3	1	1	0														0.636	-2.28	79	2	107	3	23	14	1	43.9	7.13	60.76	86.49	0.37

## Sheet: codebook
Items	code number	definition
Type of plasmapheresis donors	0	new donor
	1	repeat donor
Region	0	linwu
	1	jiangge
Sex	0	female
	1	male
Income(per year)	1	＜30 thousand yuan
	2	30-80 thousand yuan
	3	＞ 80 thousand yuan
Weekly exercise and physical labor intensity	1	＜10 hours
	2	10-50 hours
	3	＞50 hours
Dietary intake of meat, eggs, and dairy products	1	never
	2	often
	3	everyday
Calcium supplements	1	never
	2	often
	3	everyday
vitaminD supplements	1	never
	2	often
	3	everyday
Menopausal condition	1	menopausal
	0	male
Total number of donations (group)	0	new donor
	1	50-100 times
	2	101-200times
	3	＞200 times
The recent frequency of donation（group）	0	new donor
	1	1-8 times
	2	9-16 times
	3	17-24 times
Interval between the last donation（group）	0	new donor
	1	14 days
	2	15-28 days
	3	＞28 days
